# Supplementary material for: Drawing everyday sexism in academia: observations and analysis of a community-based initiative
Source: Copernicus journal article supplement (doi:10.5194/adgeo-53-15-2020), 2020-04-02
Supplement: Supplementary file 1 [file adgeo-53-15-2020-supplement.pdf]

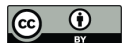

*Supplement of*

## **Drawing everyday sexism in academia: observations and analysis of a community-based initiative**

**Marie Bocher et al.**

*Correspondence to:* Did this really happen?! team ([mail.didthisreallyhappen@gmail.com](mailto:mail.didthisreallyhappen@gmail.com))

The copyright of individual parts of the supplement might differ from the CC BY 4.0 License.

This supplementary material is composed of two parts:

1) From pages 3 to 34 we propose a printable booklet with all the comic strips of the project.

2) From pages 36 to 44 we propose nine printable posters

This work is licensed under a Creative Commons Attribution-NonCommercial-NoDerivatives 4.0 International License.

Booklet

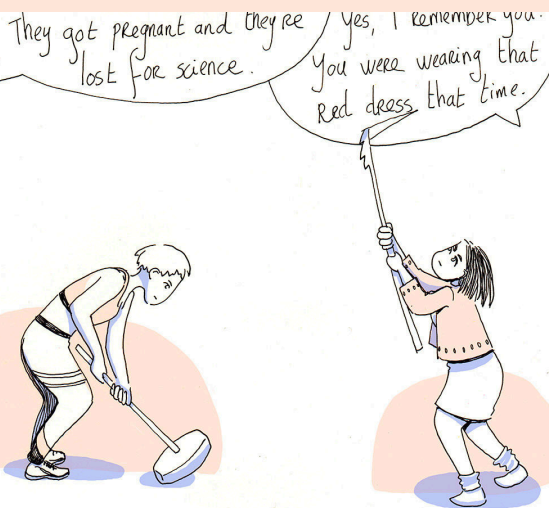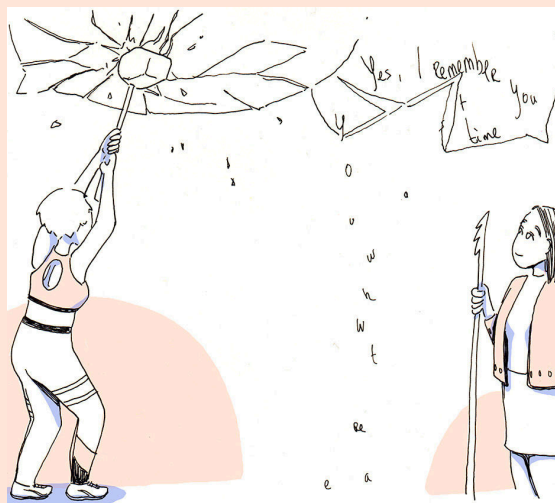

# DIDTHISREALLYHAPPEN.NET

promoting gender equality in academia

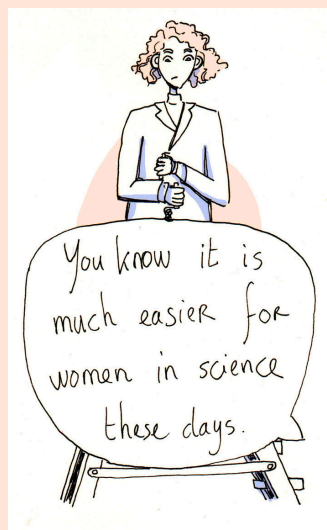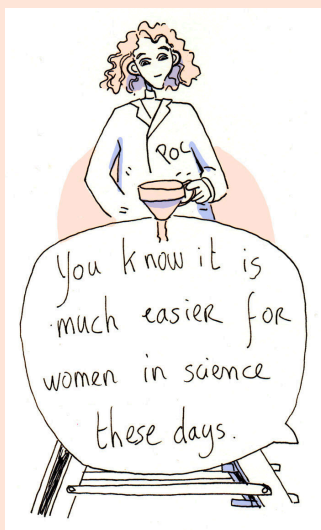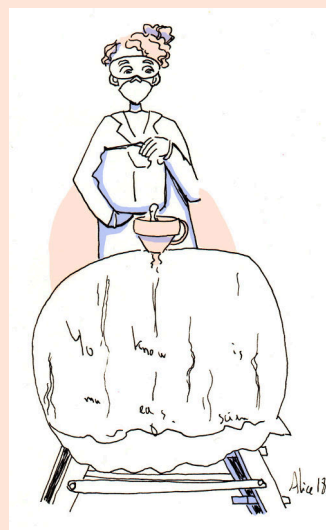





# A MAN'S WORLD

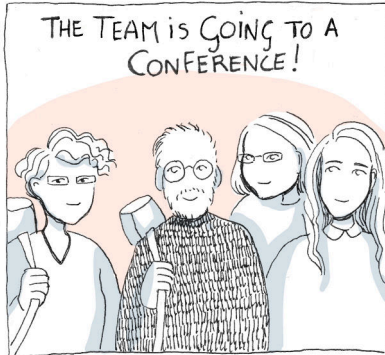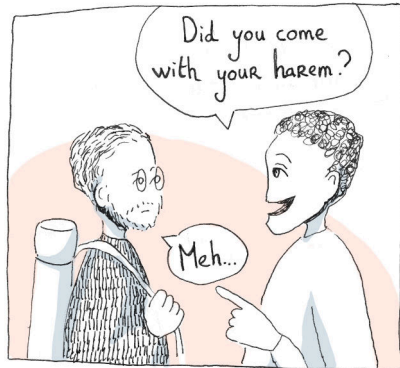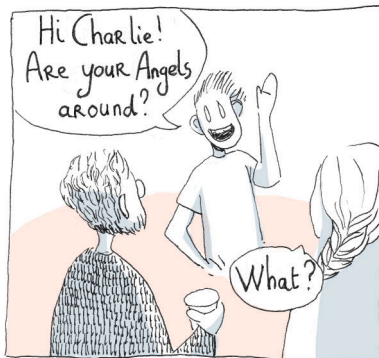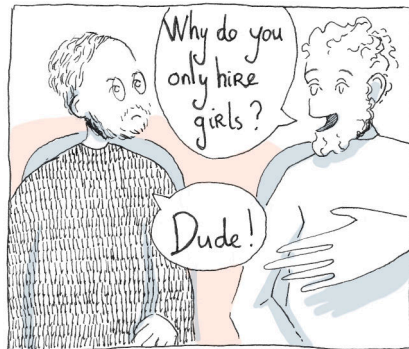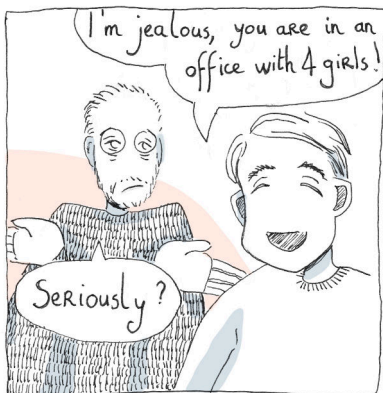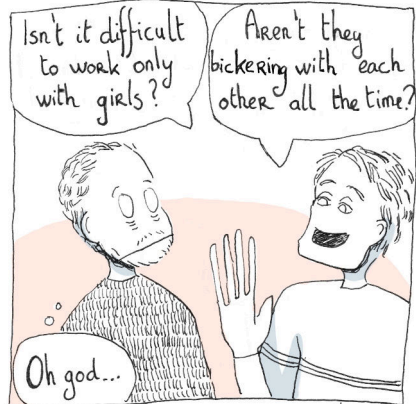

## CONFERENCE CLASSIC

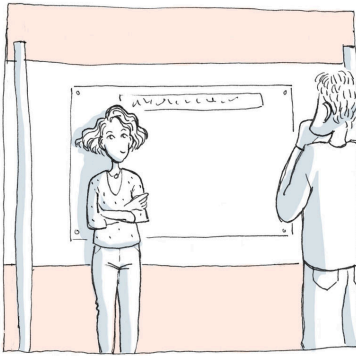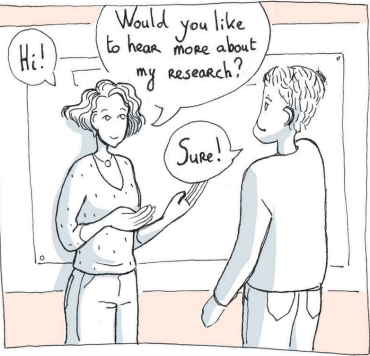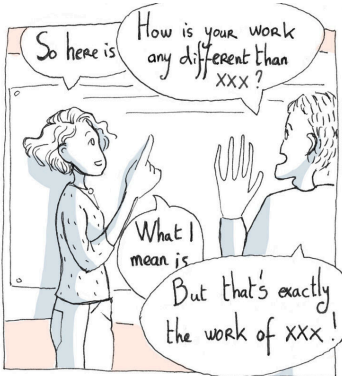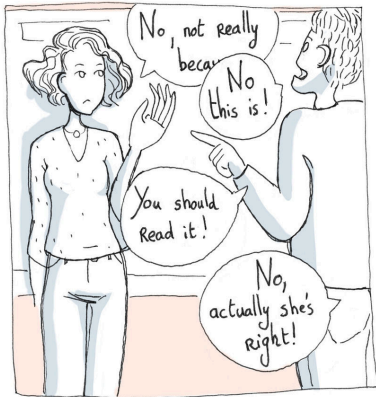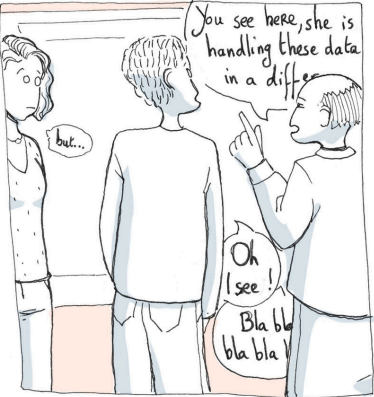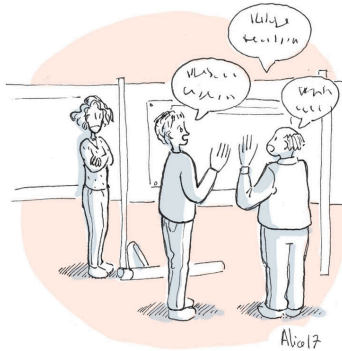

# HIS WIFE GOT PROMOTED

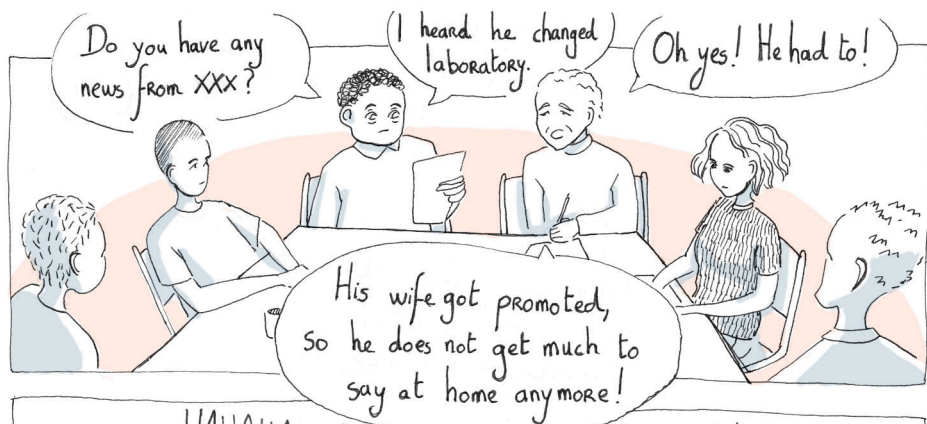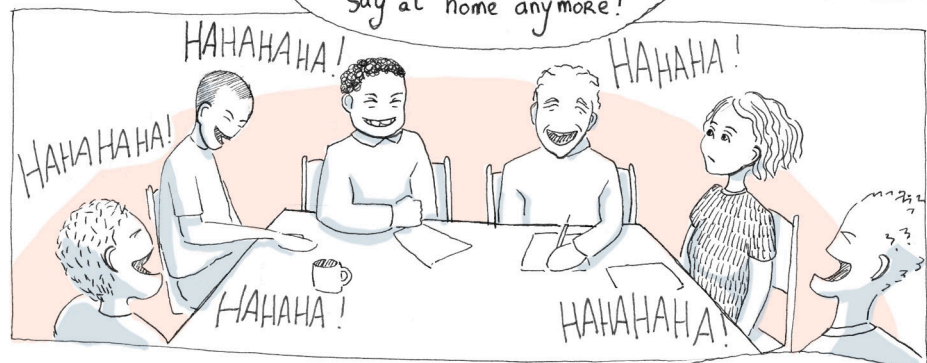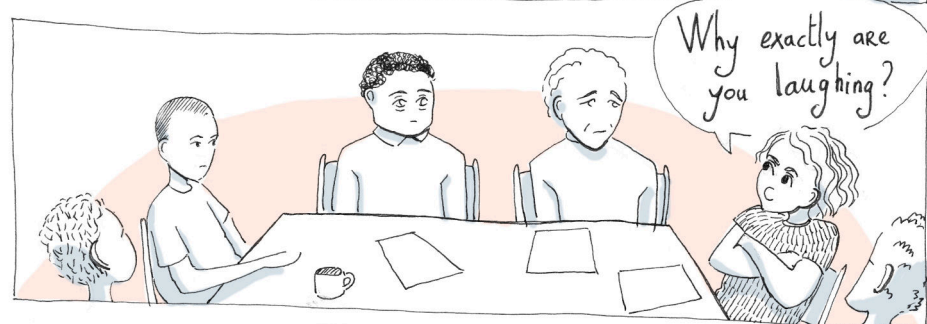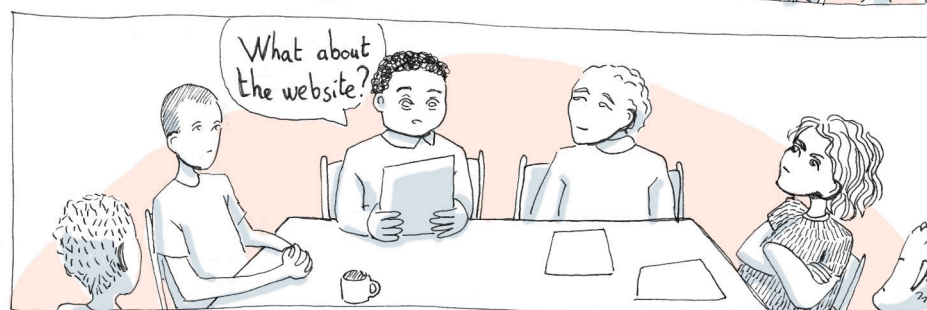

# FOREVER GIRLS

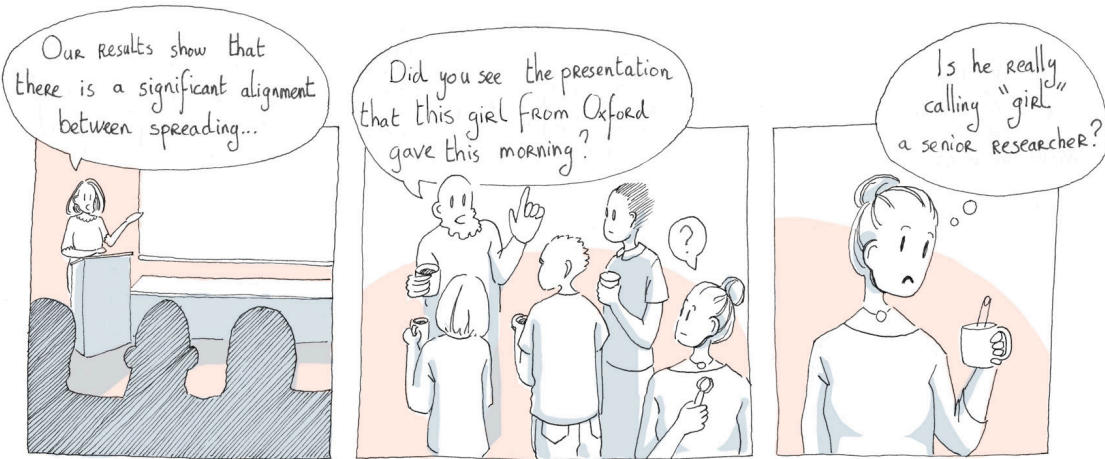

Alia17

# YOU'RE A SMART GIRL

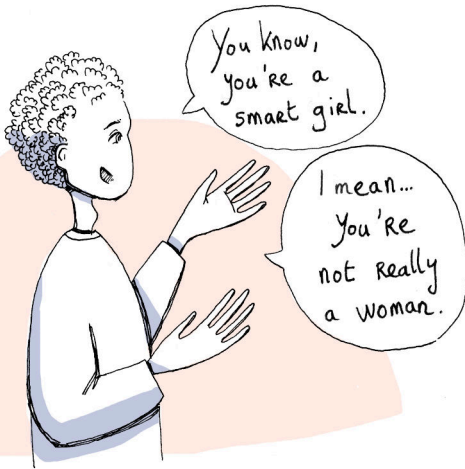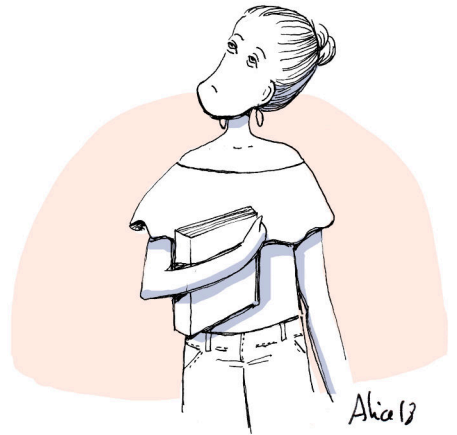

Alice

# P R I N T E R

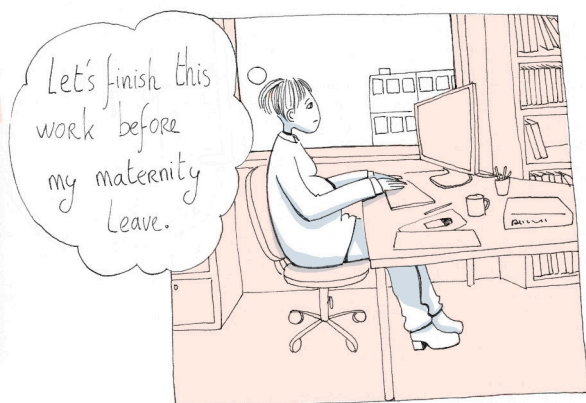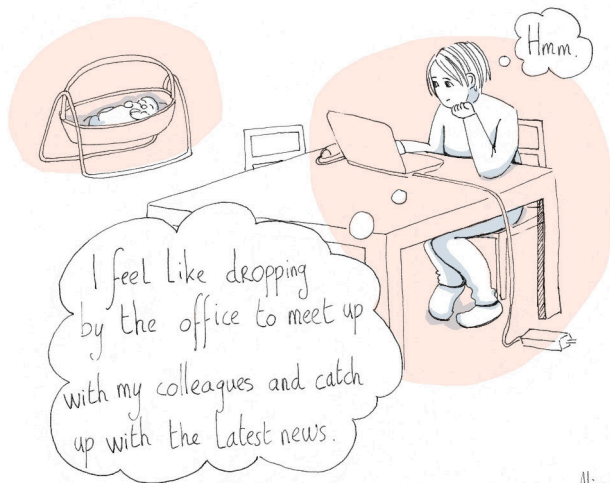



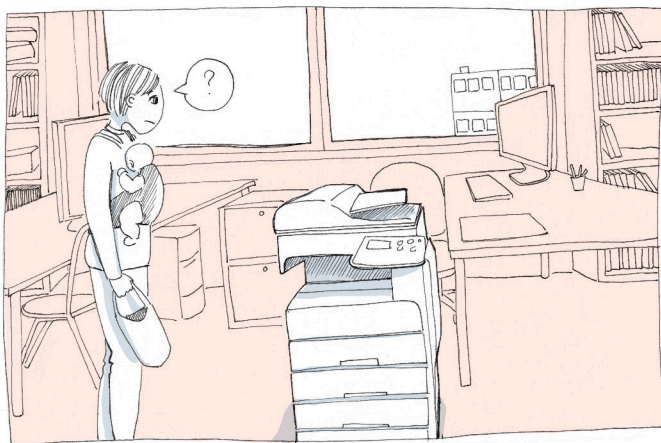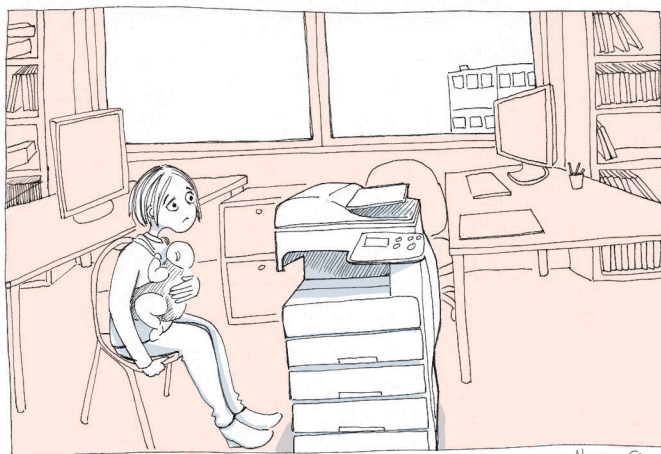

Alt. 12 (2)

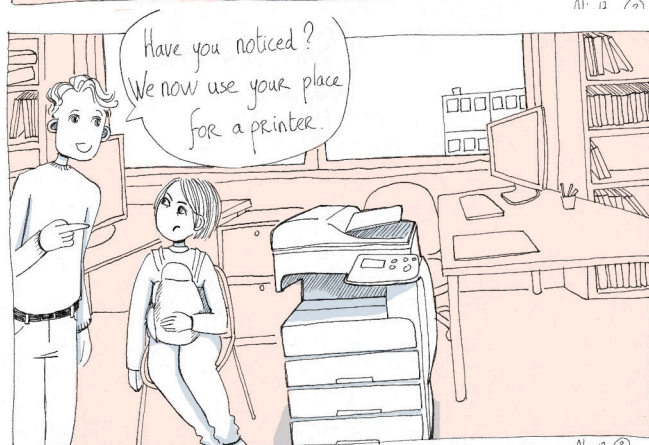

Alt. 13 (3)



**FIRST AUTHOR**

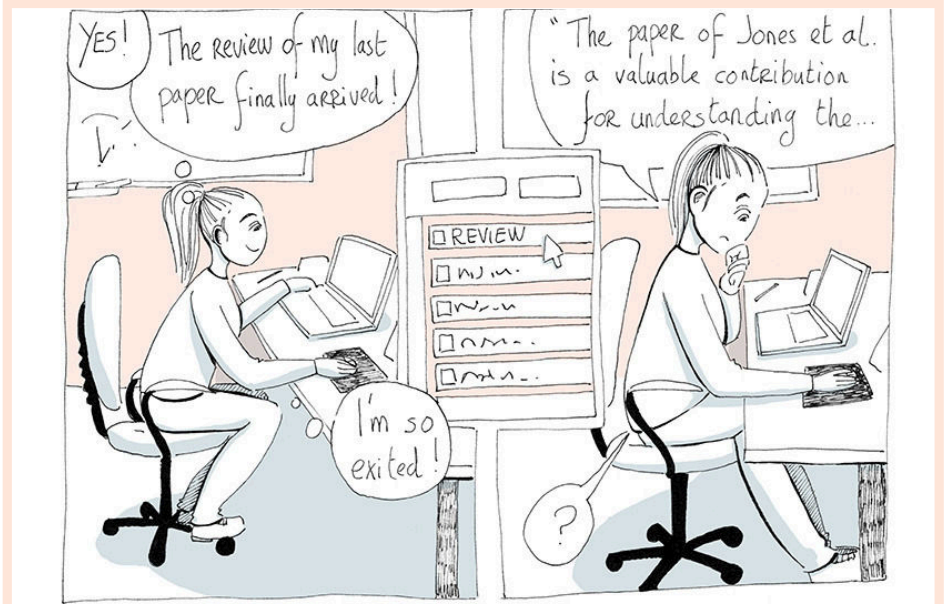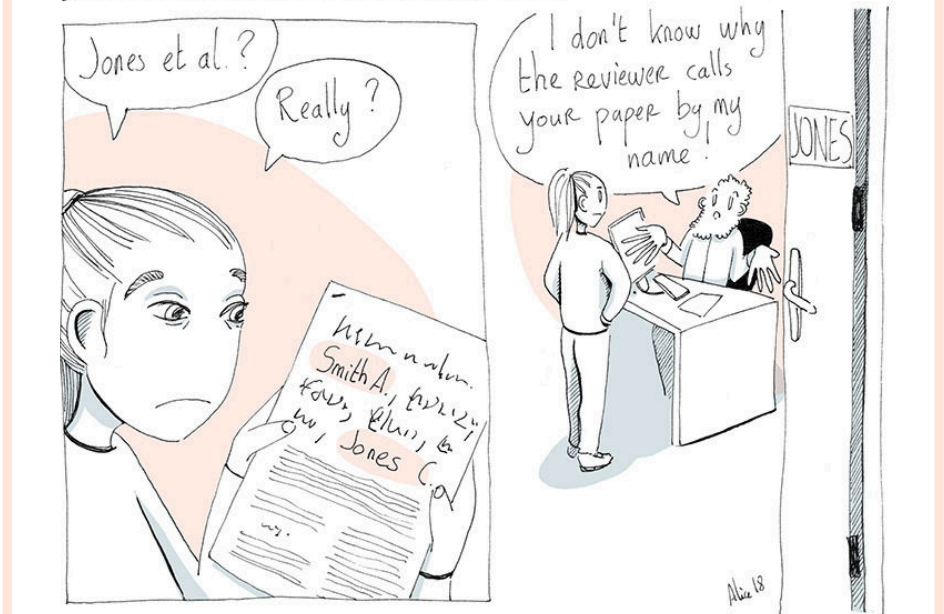

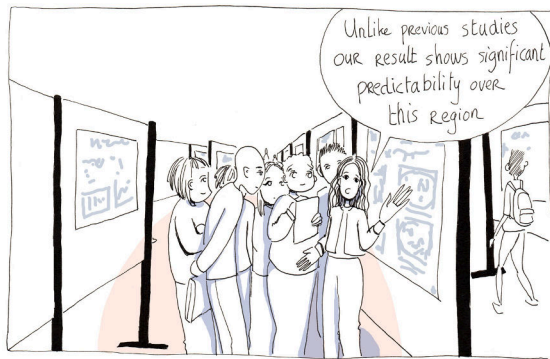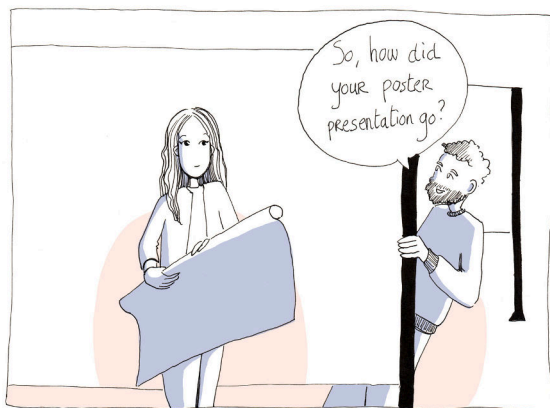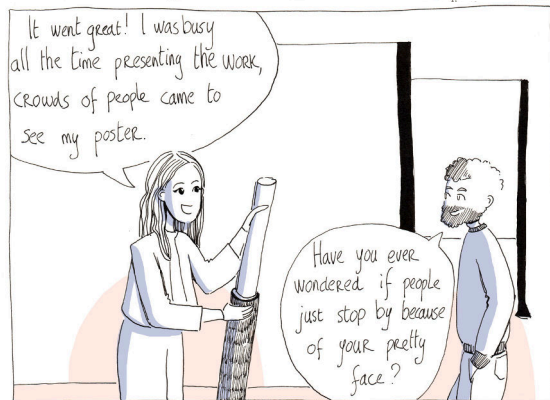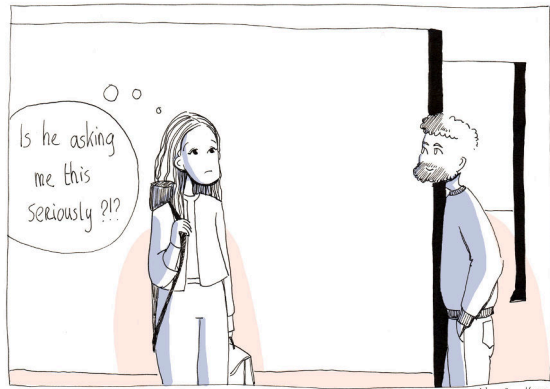

PRETTY  
FACE

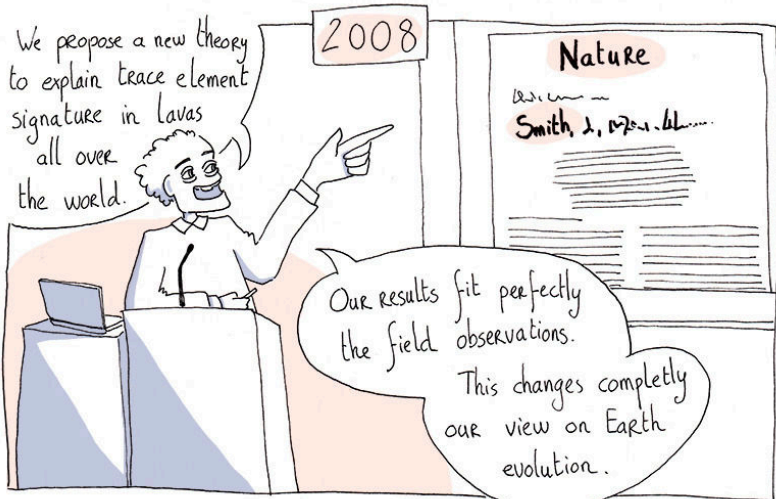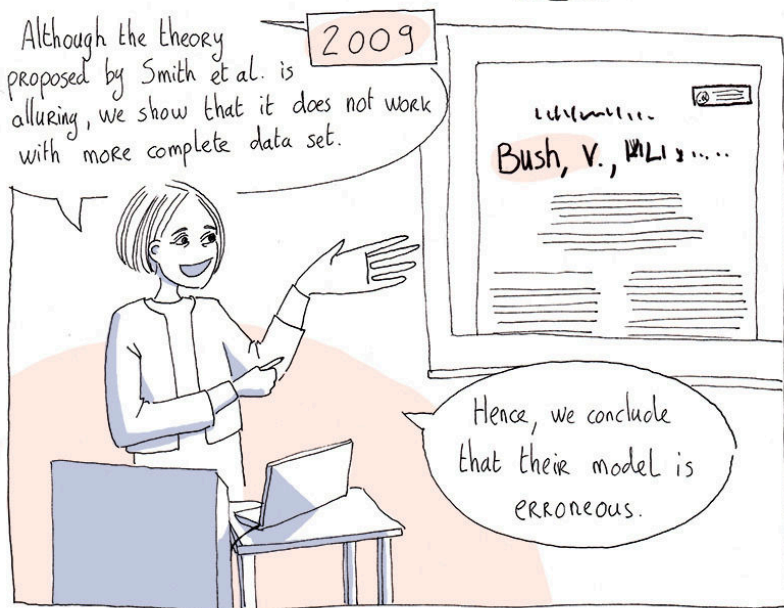

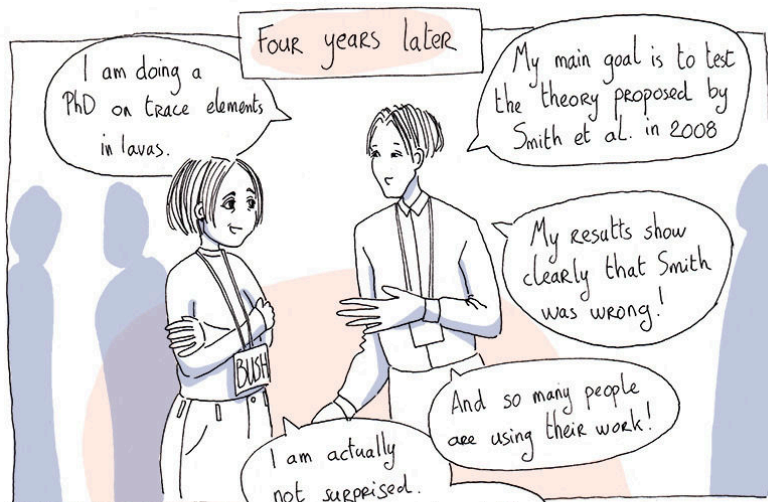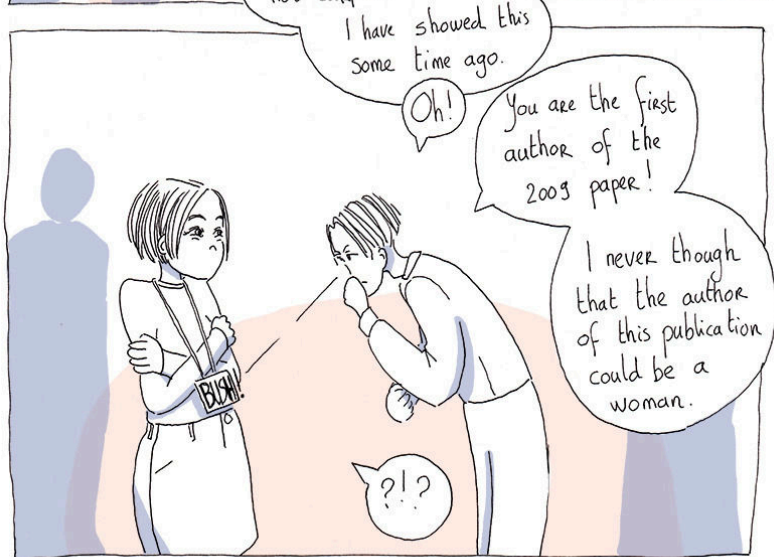

ARE YOU A STUDENT?

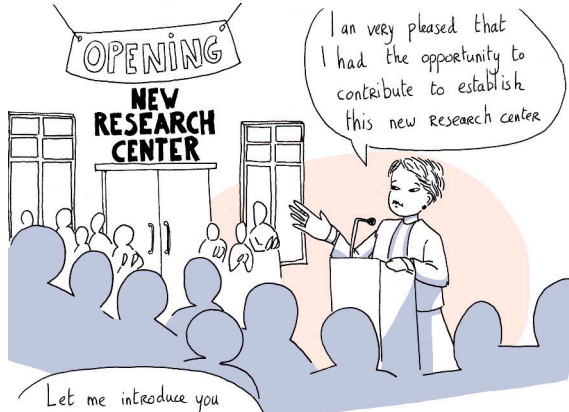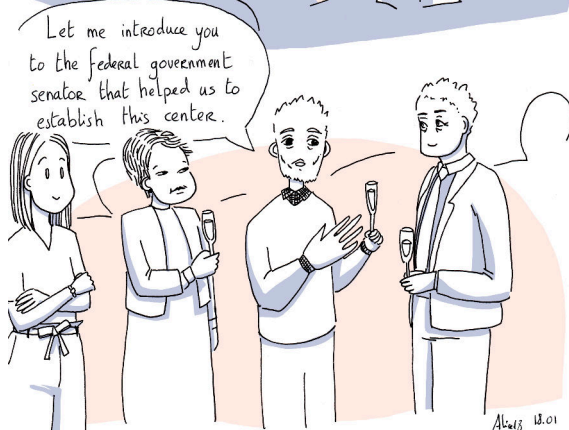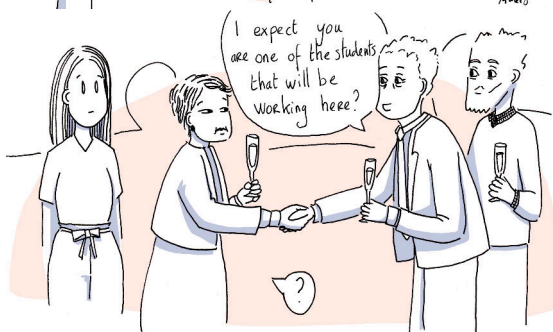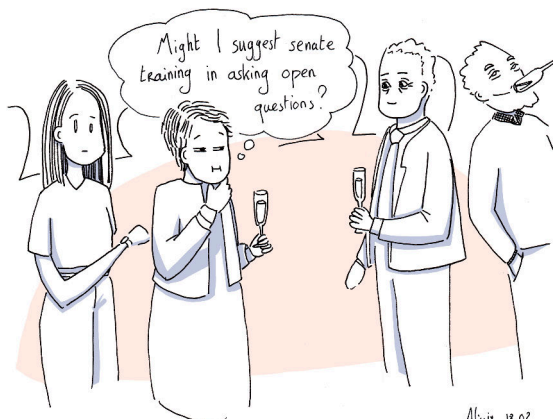



# NICE HEADPHONES

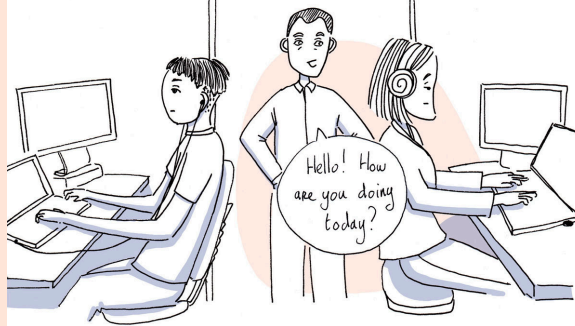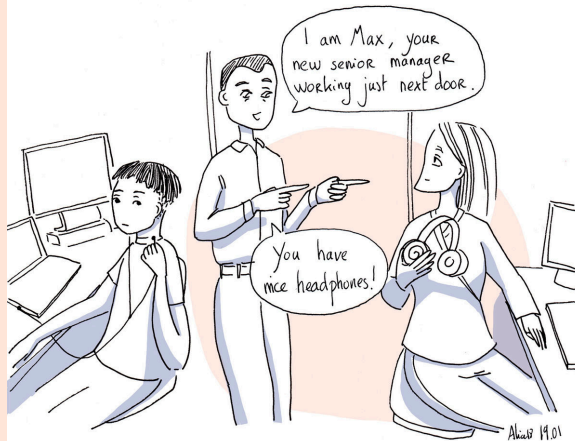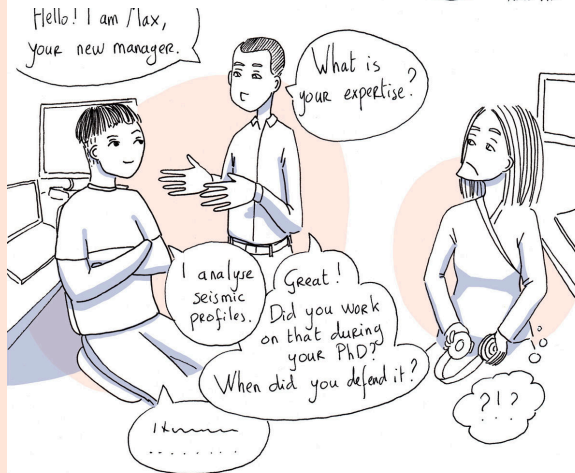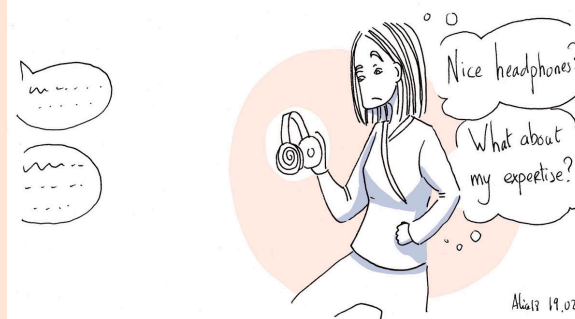

# BEING INVITED

INVITATION

YOU'LL GIVE A  
SEMINAR  
IN THE  
FAMOUS  
LAB NEXT DOOR

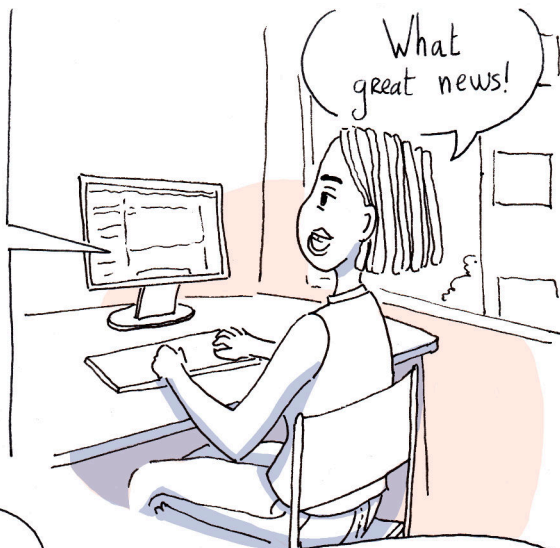

I just received an invitation  
for a talk at your lab.

It's an  
honor.

Yeah, in fact they invited you  
because we realized that for  
the last three month, only men  
gave talks.

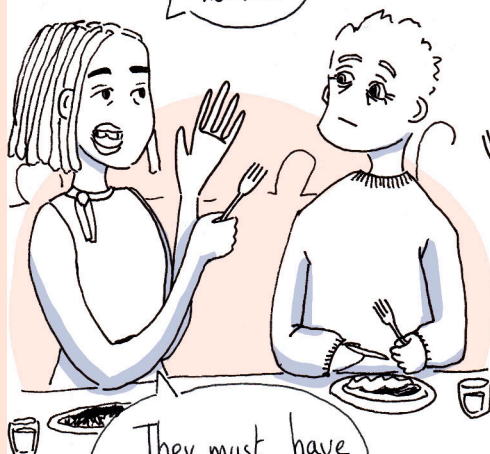

They must have  
read my recent  
publications.

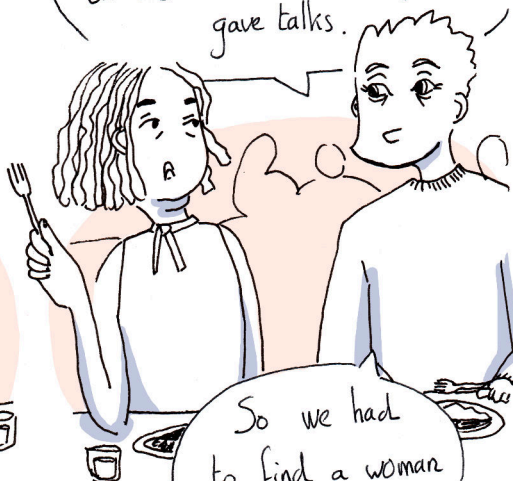

So we had  
to find a woman  
researcher.

# CONFERENCE WAKE UP

SUPER IMPORTANT  
SCIENCE CONFERENCE

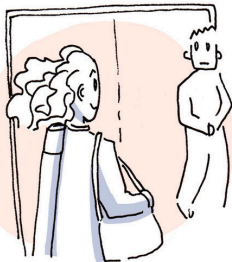

It's normal that men are more aggressive during discussions because they have more testosterone.

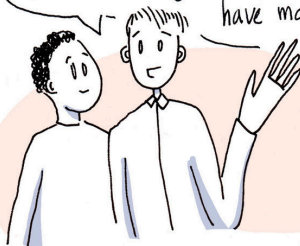

Is he joking?

No, actually this is not a joke

Women are doing great these days.

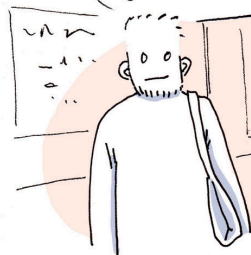

It's way easier for them nowadays.

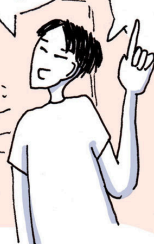

Is this a joke?

He actually might be serious.

There is still no woman among this important science medal recipient!

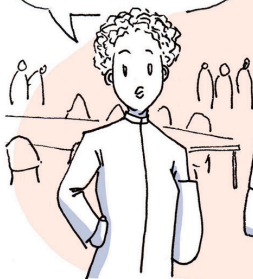

This is normal, men are smarter.

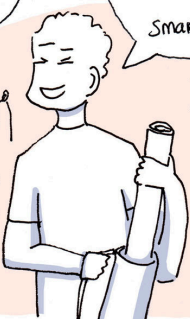

Just kidding!

This time it is a joke.

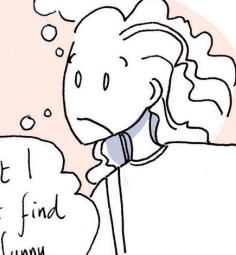

But I don't find it funny.



# RECRUITMENT CRITERIA

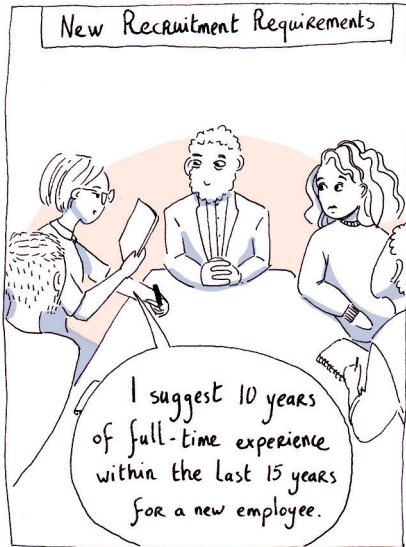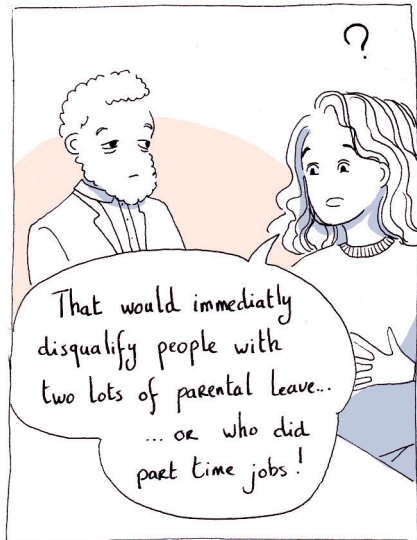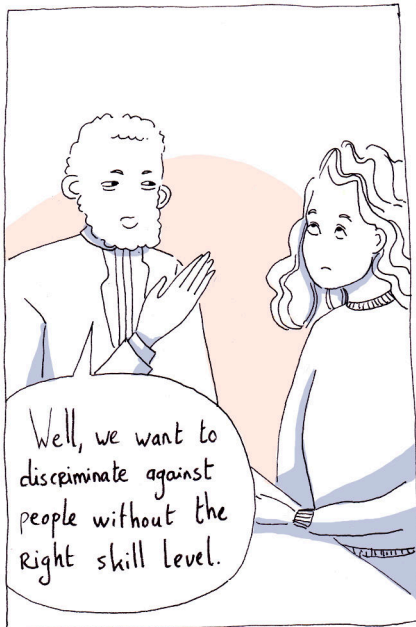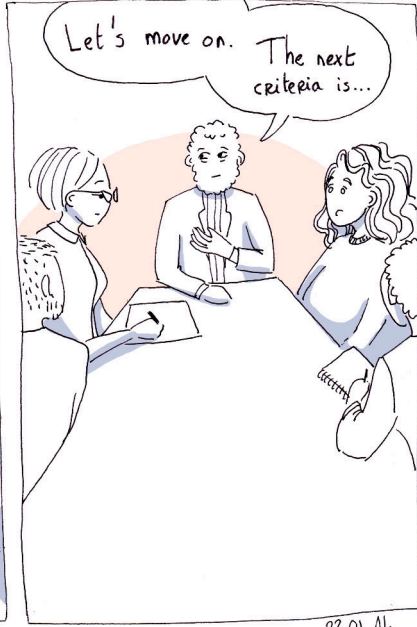

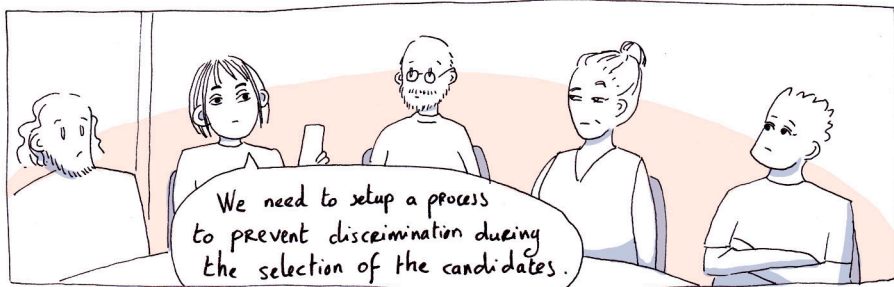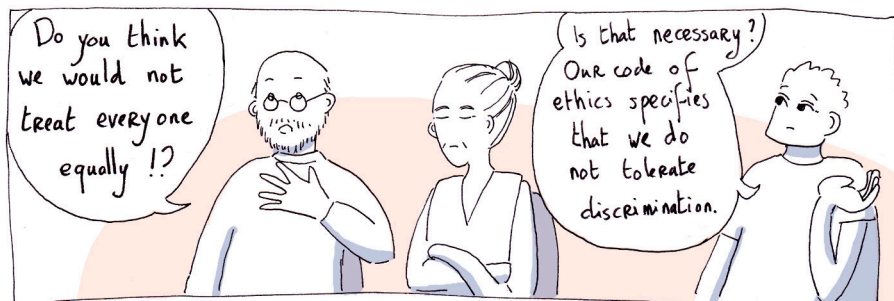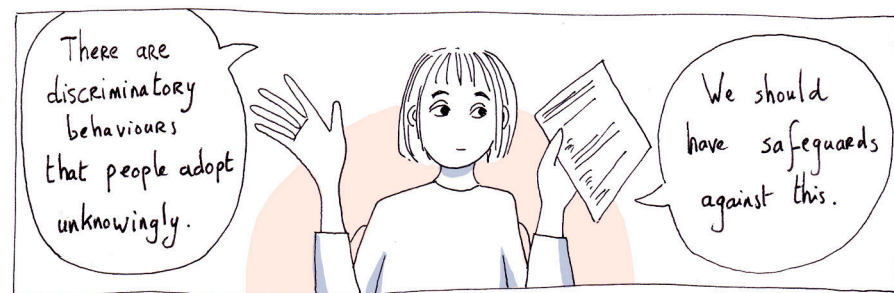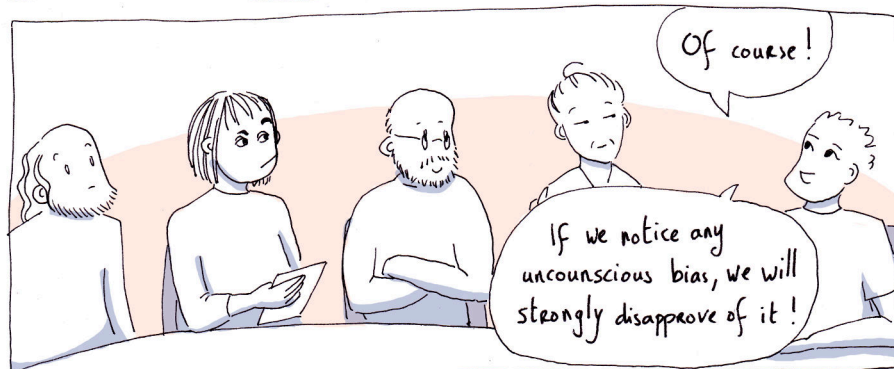

27.02 Alice

**DO YOU THINK WE'RE SEXIST?!**

# I NEED FOR A WOMAN ALIBI

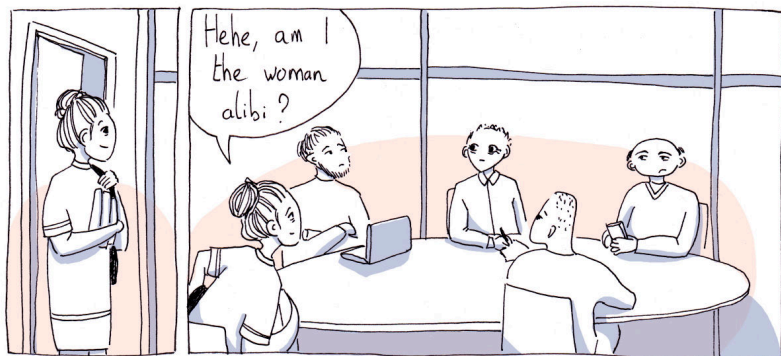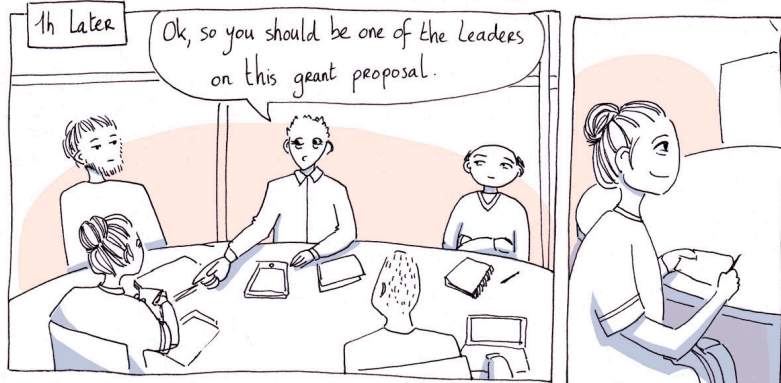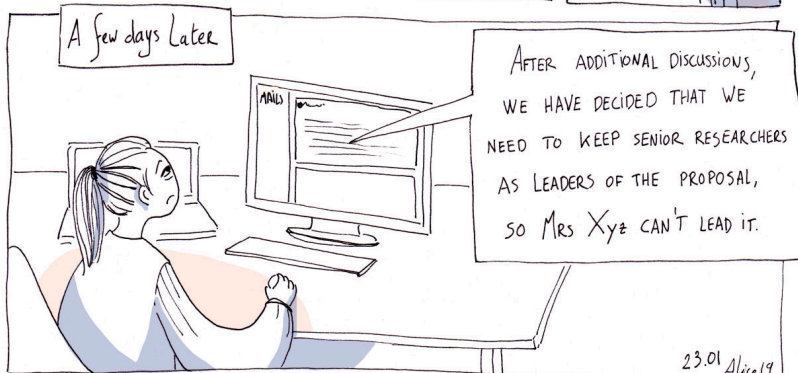

23.01 Alice19

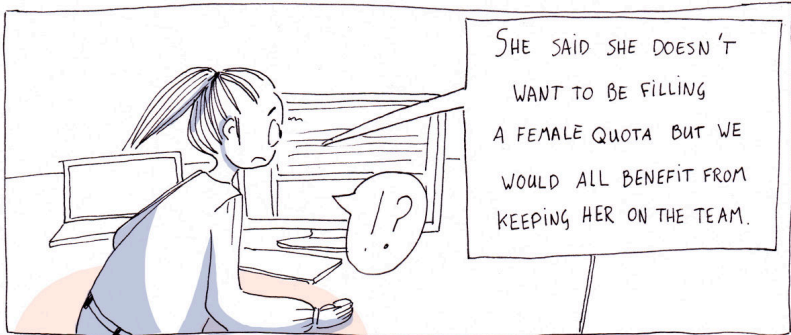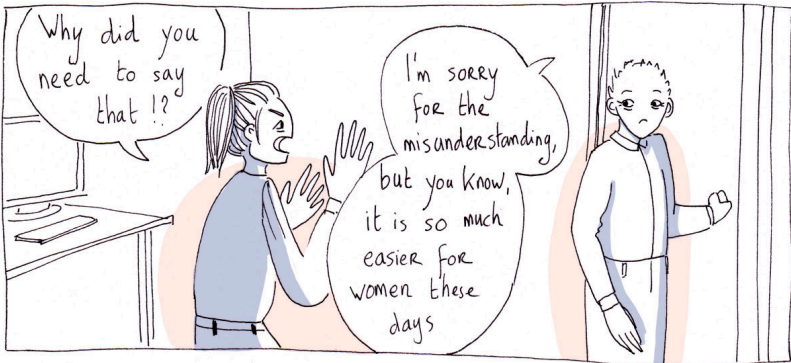

23.02 Alice19

# EMAIL OVERLOOK

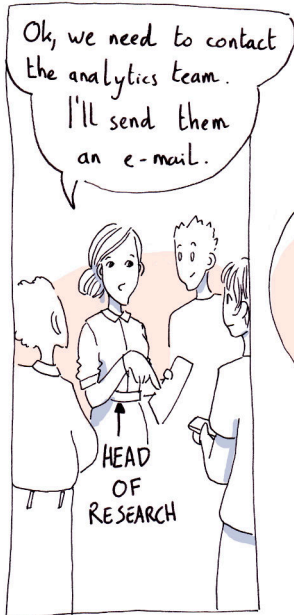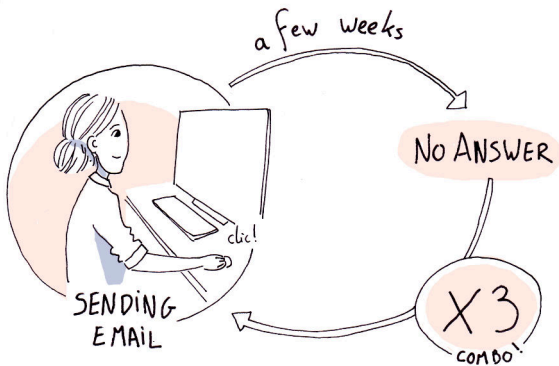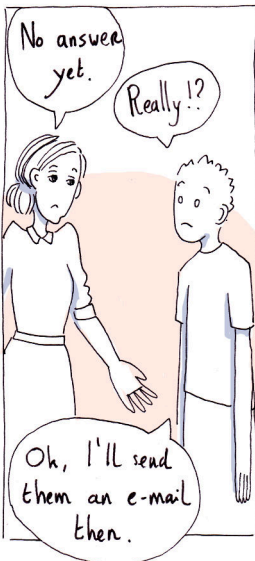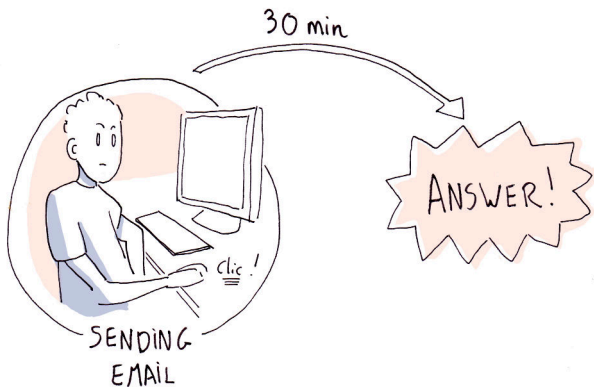

Alice 20  
25.01



# GOOD LOOKING YOUNG WOMAN

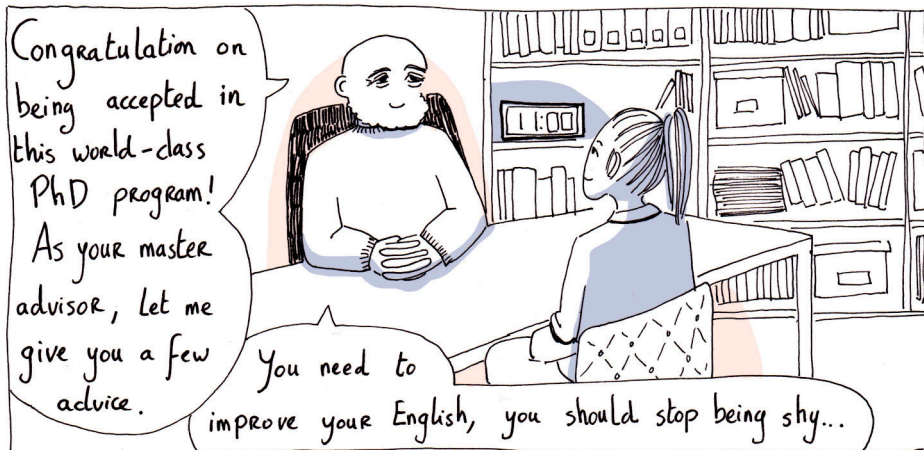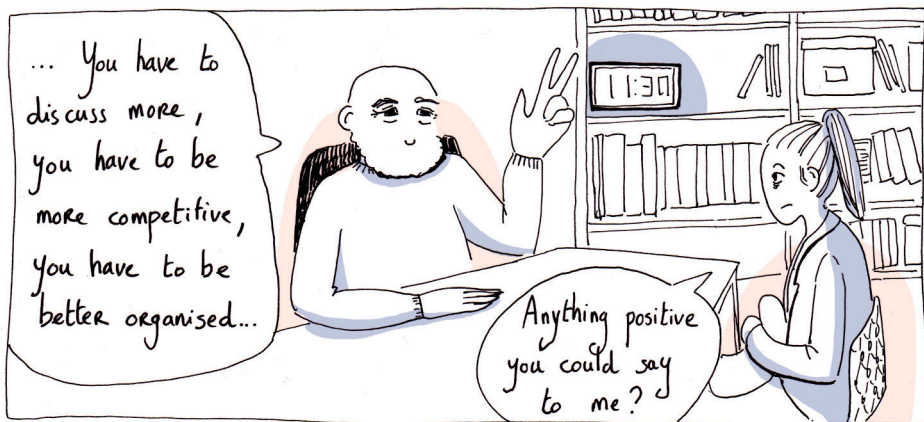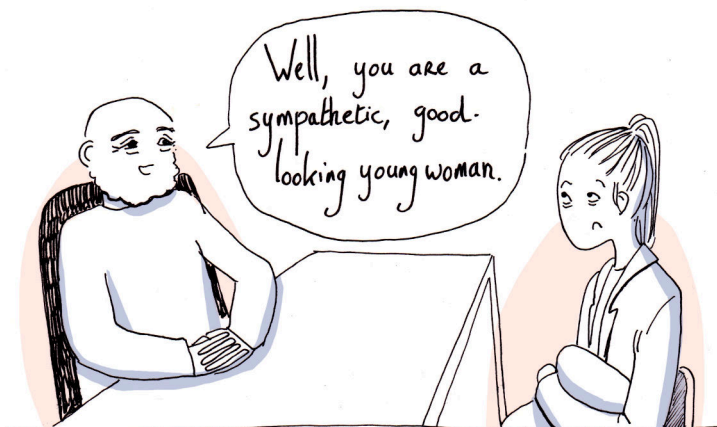

# FIELD TRIP TAKEOVER

How about organizing a field trip during this international conference?

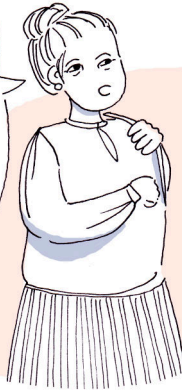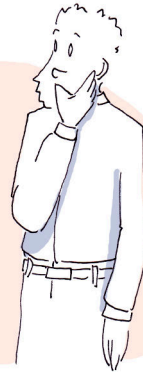

Sure, Dr RisingStar would be a nice addition to the organizing team!

## DISTRIBUTION OF THE FIELD TRIP PREPARATION TASKS

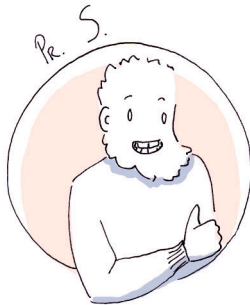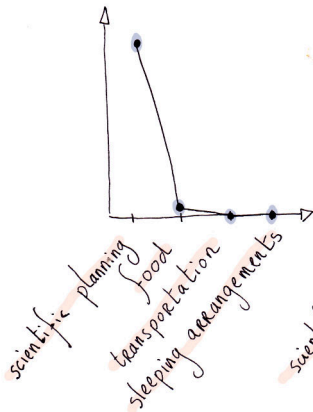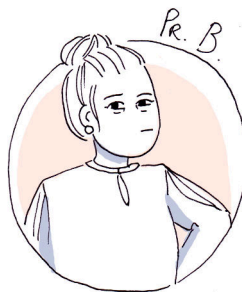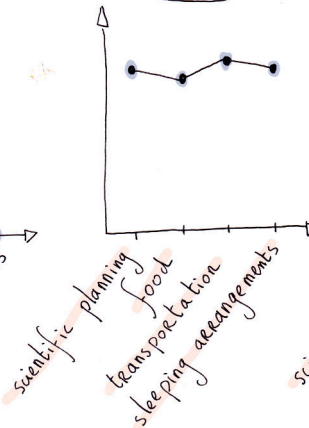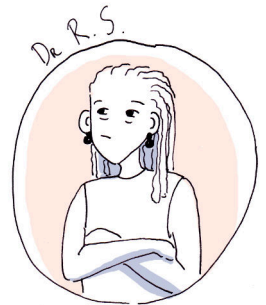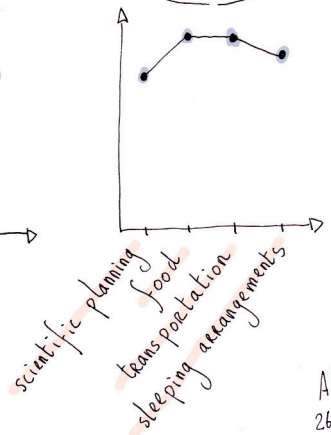





# INTERNATIONAL CONFERENCE

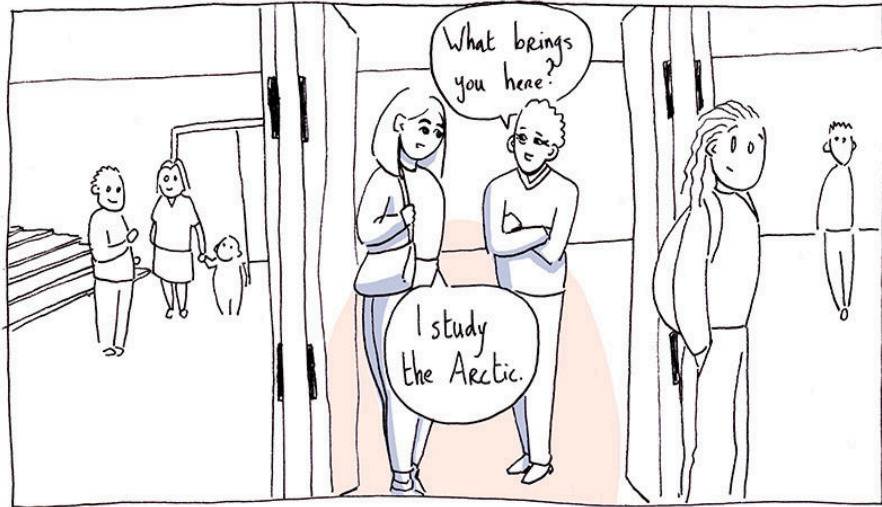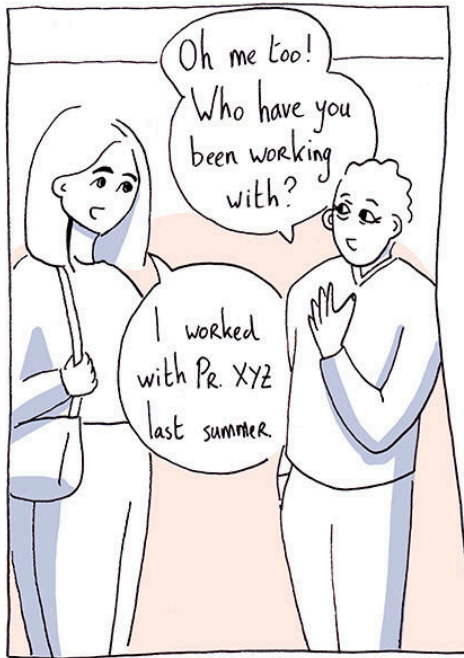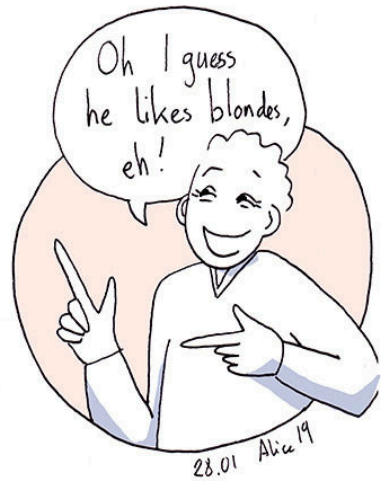

**THE PROFESSOR LIKES BLONDES**

# LITTLE LADY

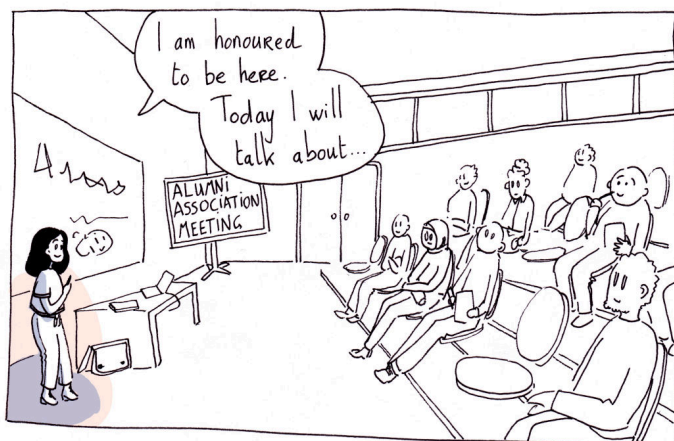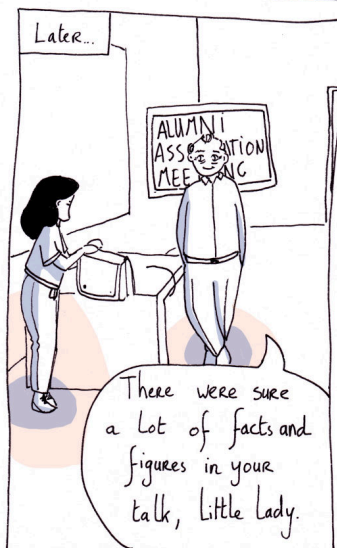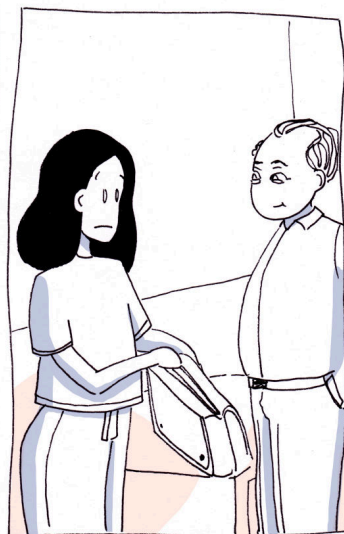

Ali: 19 34.01

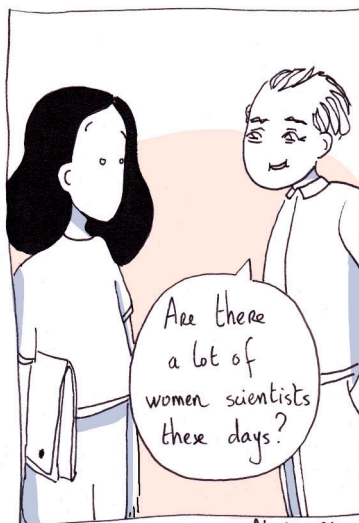

Ali: 19 34.02

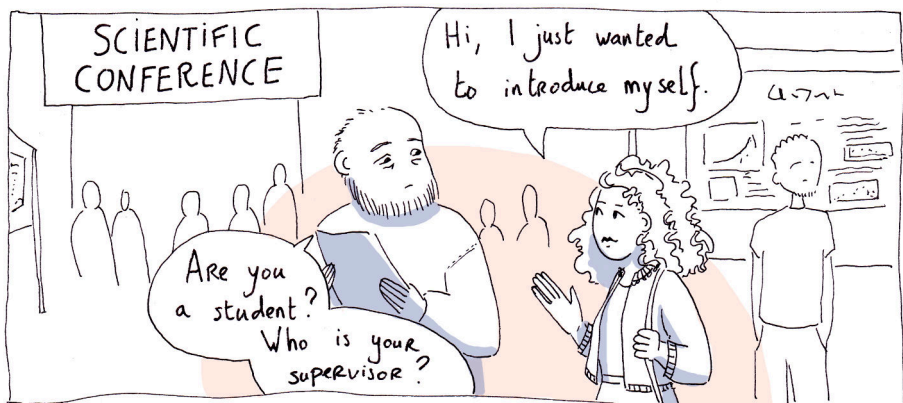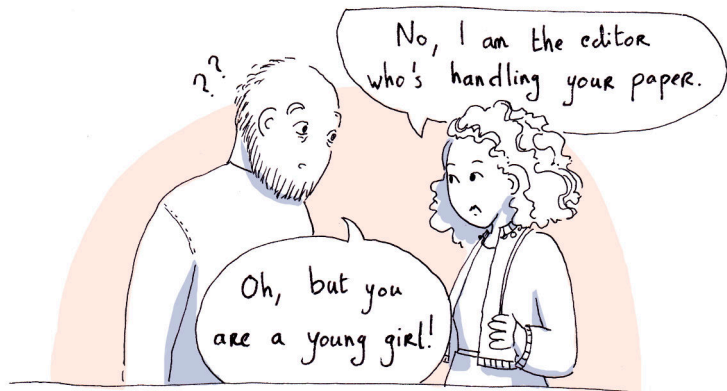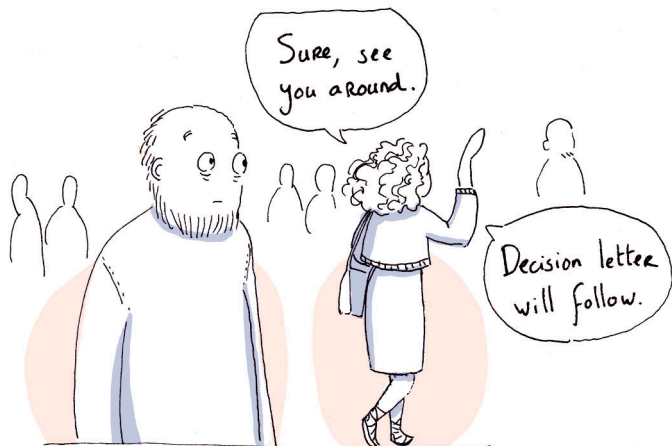

Alia 36.01

WHO'S YOUR ADVISOR?

# GRAD SCHOOL HUSBAND

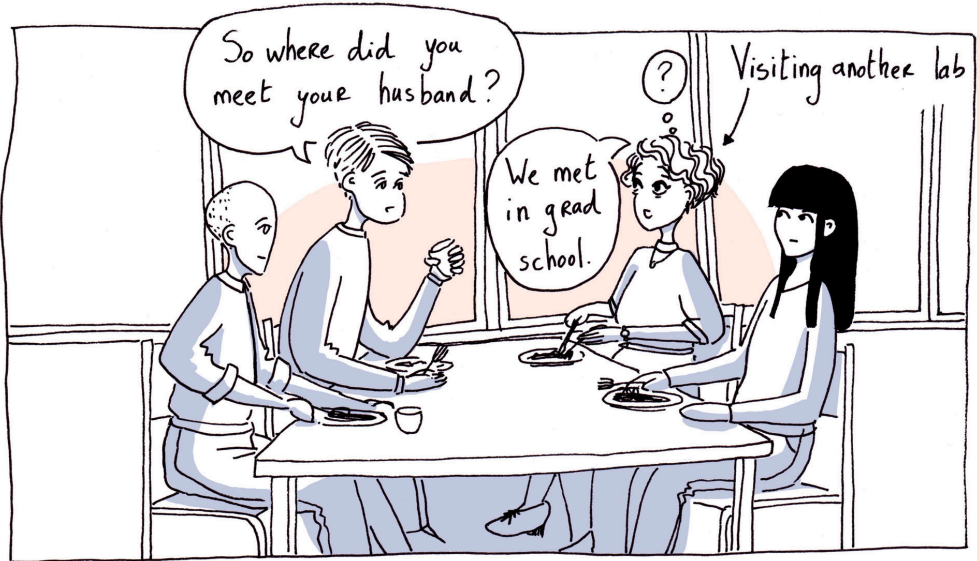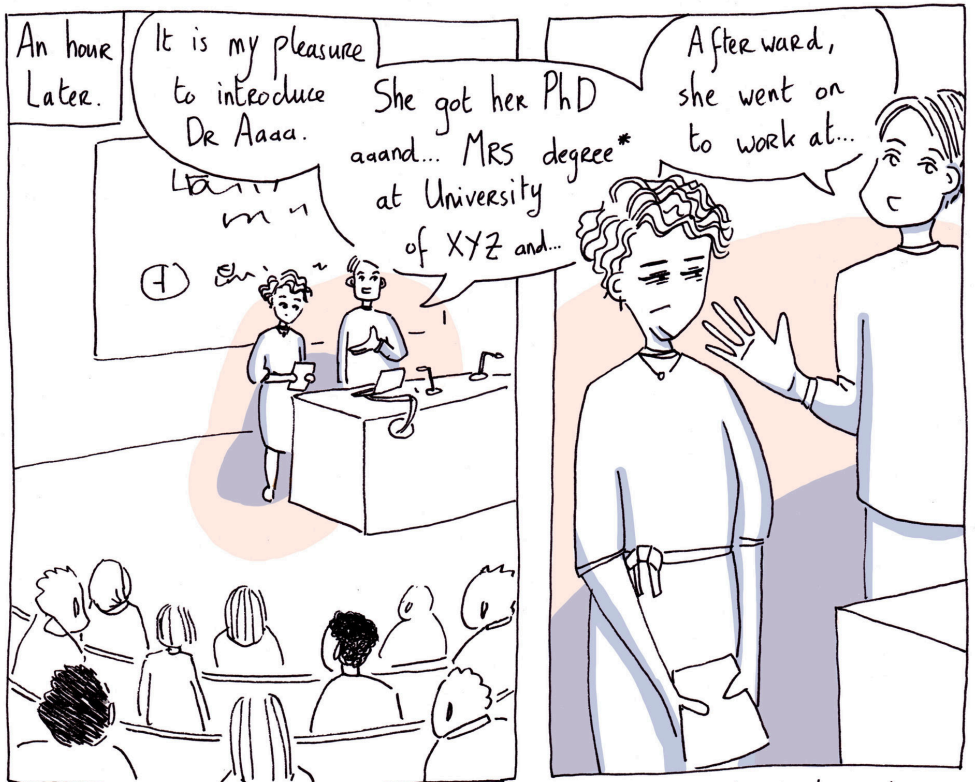

\*He is making a "joke" saying she graduated from being Miss to being Mrs.



# BREAST FEEDING AT CONFERENCES

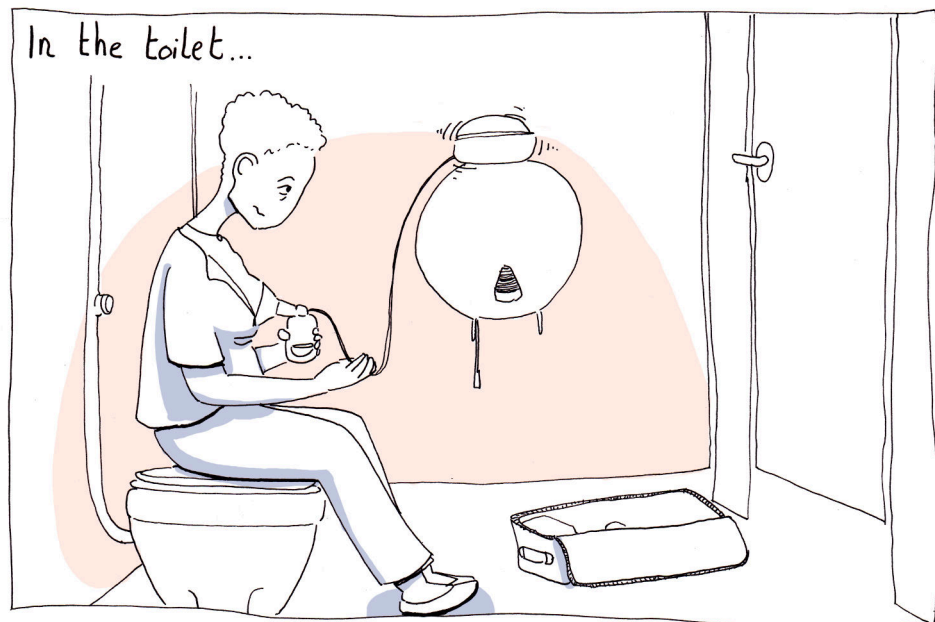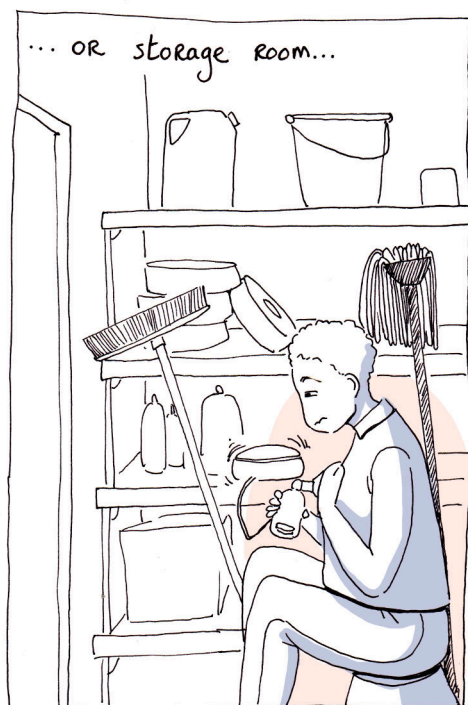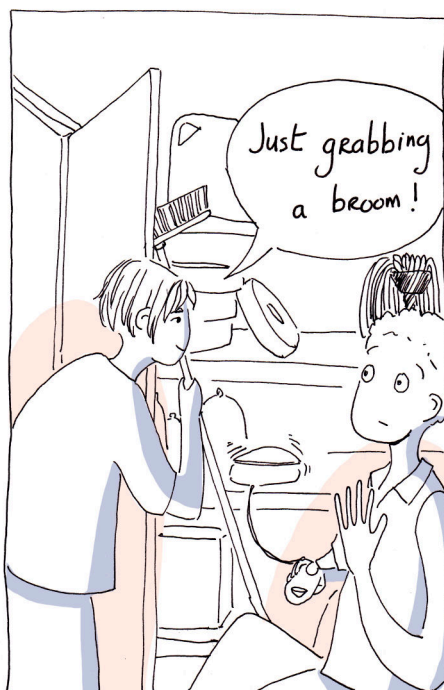



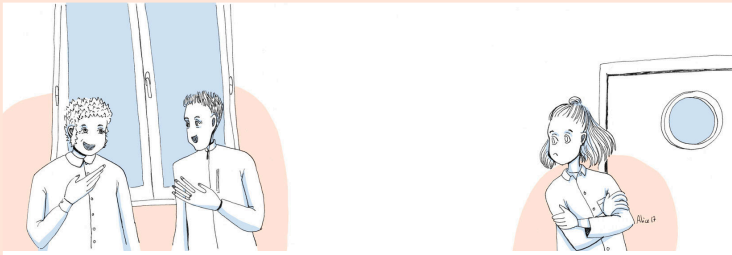

## **DIDTHISREALLYHAPPEN.NET**

help us promote gender equality in academia!

"Did this really happen?!" is a project led by seven scientists that promotes gender equality in academia. We illustrate everyday sexism and microaggressions in science with comics that are published on our webpage **didthisreallyhappen.net**. All comics represent real life experiences of individuals in scientific environments. We want to reveal unconscious biases that are present, for example, in decision making and illustrate sexist situations that researchers are confronted with in their professional life. We hope that these comics will serve as a starting point for discussions and help to create more balanced working environments. Share your story with us!

Members of the didthisreallyhappen team: Alice Adenis, Maëlis Arnould, Marie Bocher, Nicolas Coltice, Mélanie Gérard, Claire Mallard, and Martina Ulvrova. You can share your stories with us through our webpage [didthisreallyhappen.net](https://didthisreallyhappen.net) or via our email [mail.didthisreallyhappen@gmail.com](mailto:mail.didthisreallyhappen@gmail.com).

All comics were hand drawn by ©Alice Adenis. All rights reserved. You can find her artwork at <https://entrelacsbd.wordpress.com>. Booklet design ©2019 Martina Ulvrova. All rights reserved.

©  2020 didthisreallyhappen.net

 @team\_dtrh  @didthisreallyhappen

# Posters



# SYMPATHETIC AND GOOD LOOKING

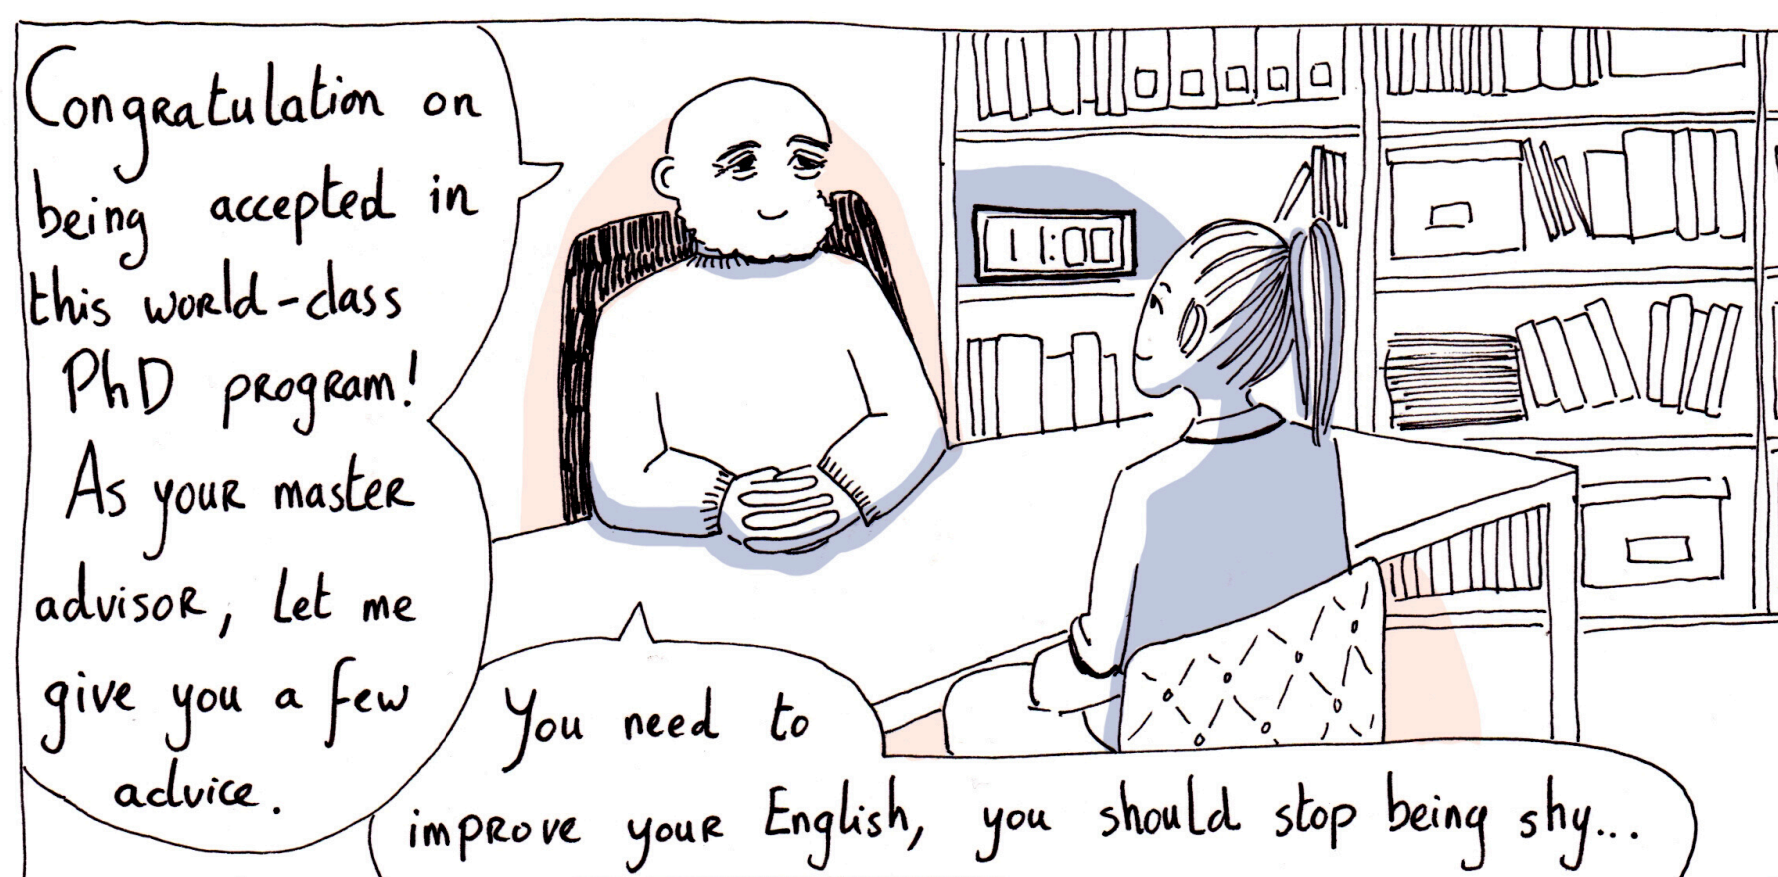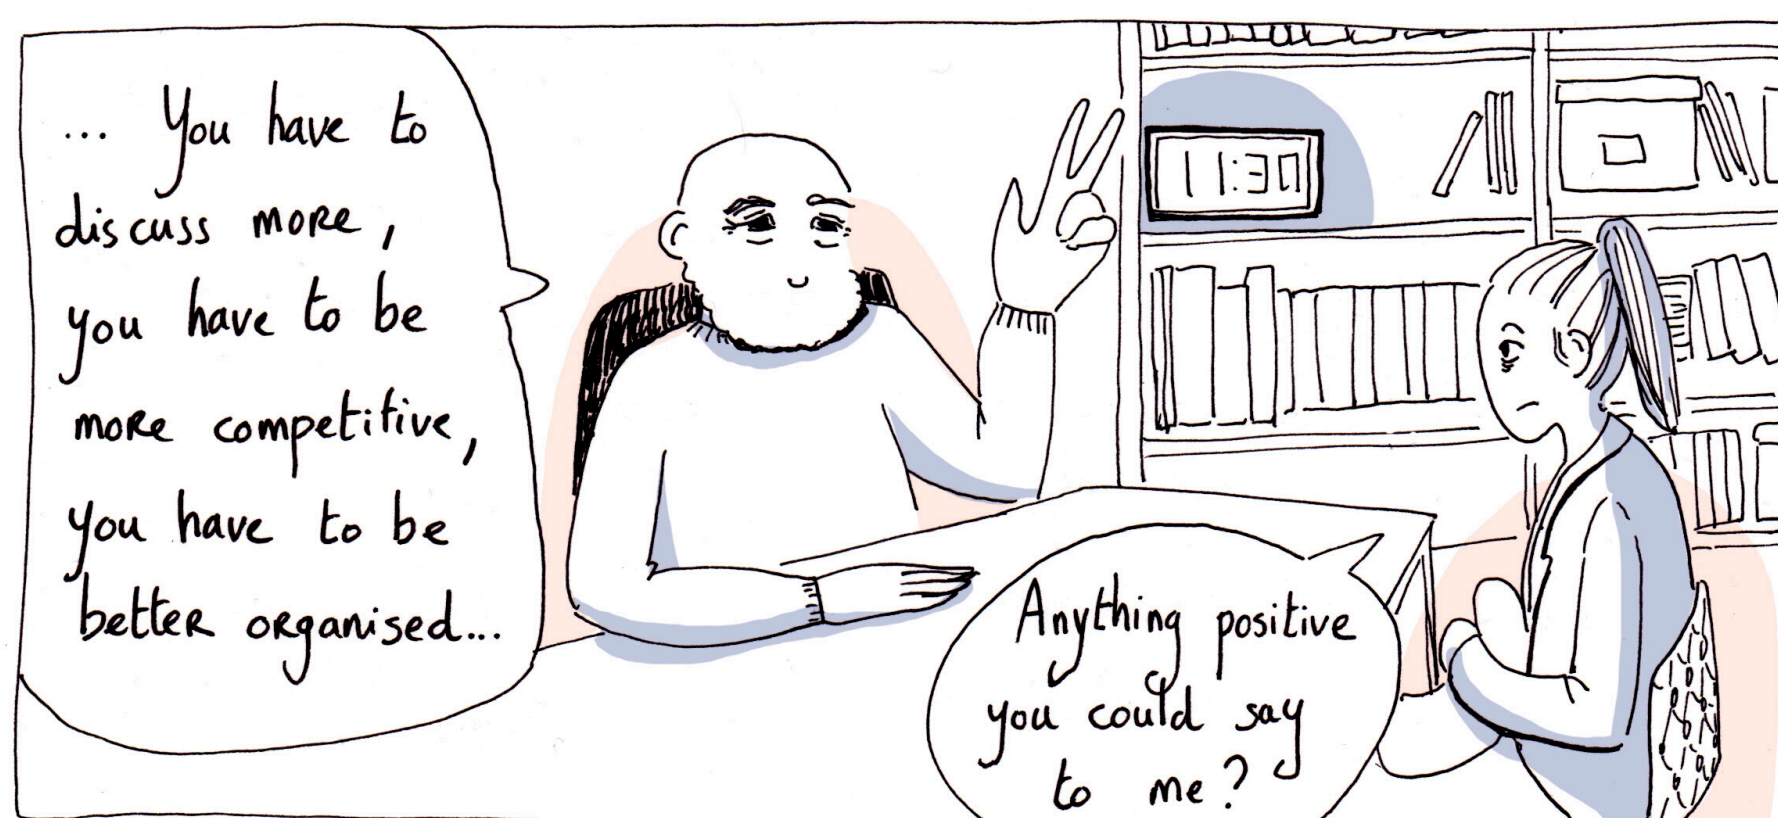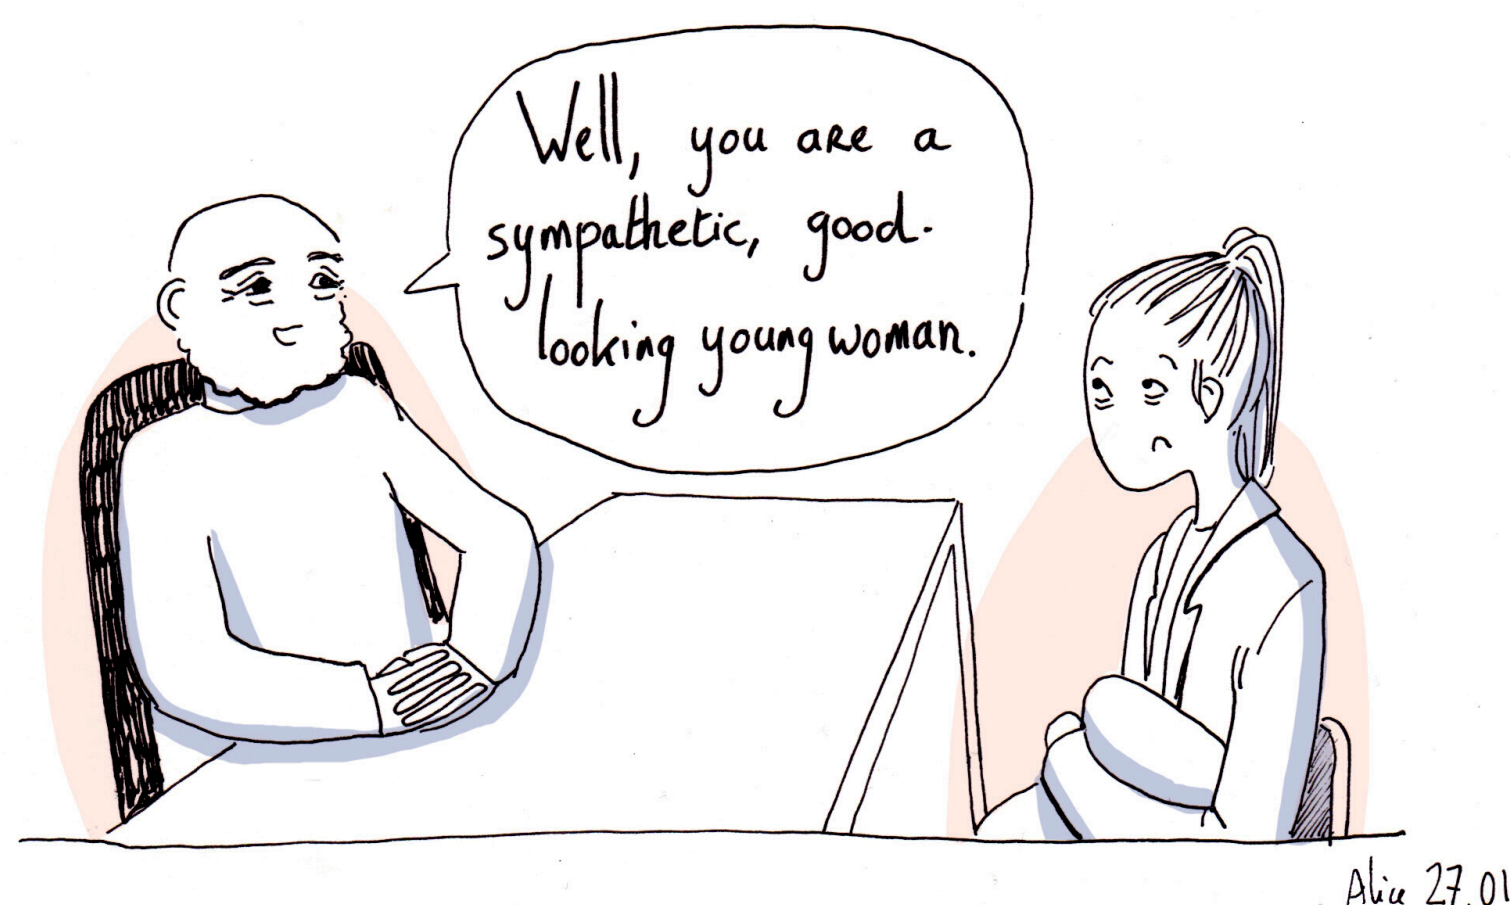

Alice 27.01

## DIDTHISREALLYHAPPEN.NET

promoting gender equality in academia

Through comics we share stories of events that actually happened, but that, we think, do not have their place in a professional environment (or in any environment, for that matter). We want to show daily sexist comments and behaviors, not to point fingers at specific people, not to show what is the right way to act, but to encourage discussions between coworkers, and, hopefully, to make people think about how, as a group, we can do better.

**SHARE YOUR STORY WITH US THROUGH OUR WEBPAGE OR VIA  
MAIL.DIDTHISREALLYHAPPEN@GMAIL.COM**



## CONFERENCE CLASSIC

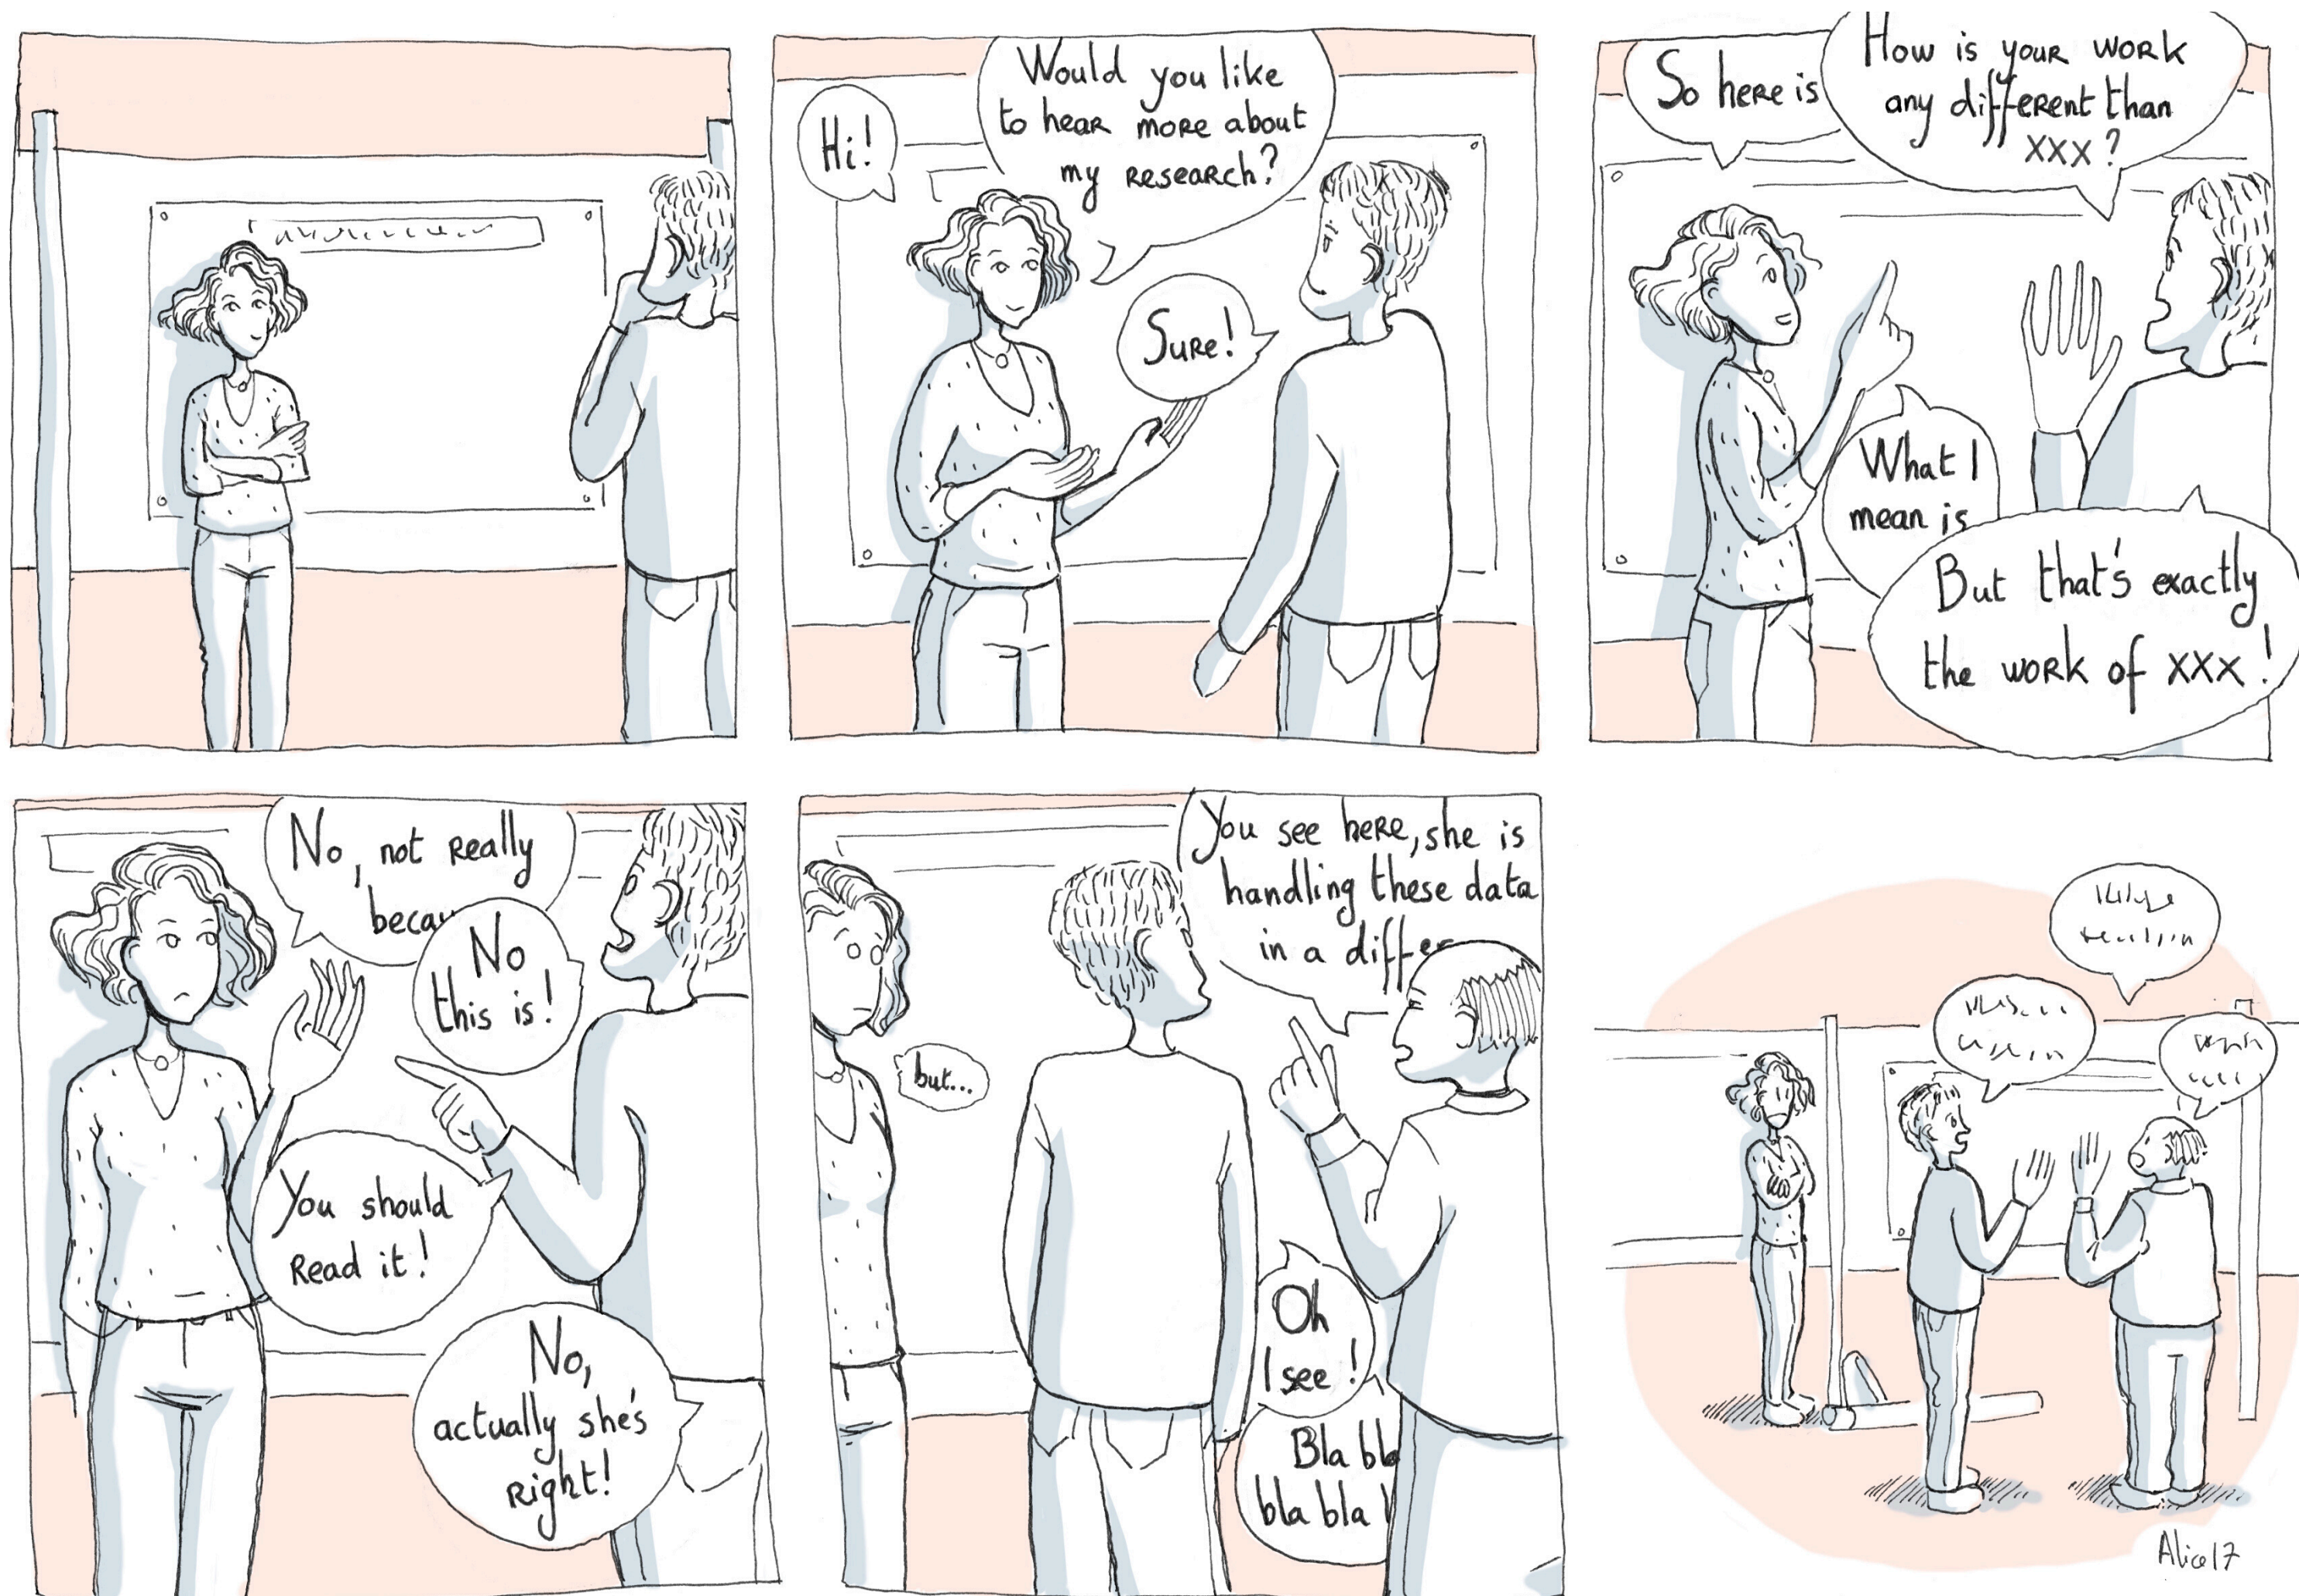

# DIDTHISREALLYHAPPEN.NET

promoting gender equality in academia

Through comics we share stories of events that actually happened, but that, we think, do not have their place in a professional environment (or in any environment, for that matter). We want to show daily sexist comments and behaviors, not to point fingers at specific people, not to show what is the right way to act, but to encourage discussions between coworkers, and, hopefully, to make people think about how, as a group, we can do better.

**SHARE YOUR STORY WITH US THROUGH OUR WEBPAGE OR VIA  
MAIL.DIDTHISREALLYHAPPEN@GMAIL.COM**



## WHO IS TAKING NOTES?

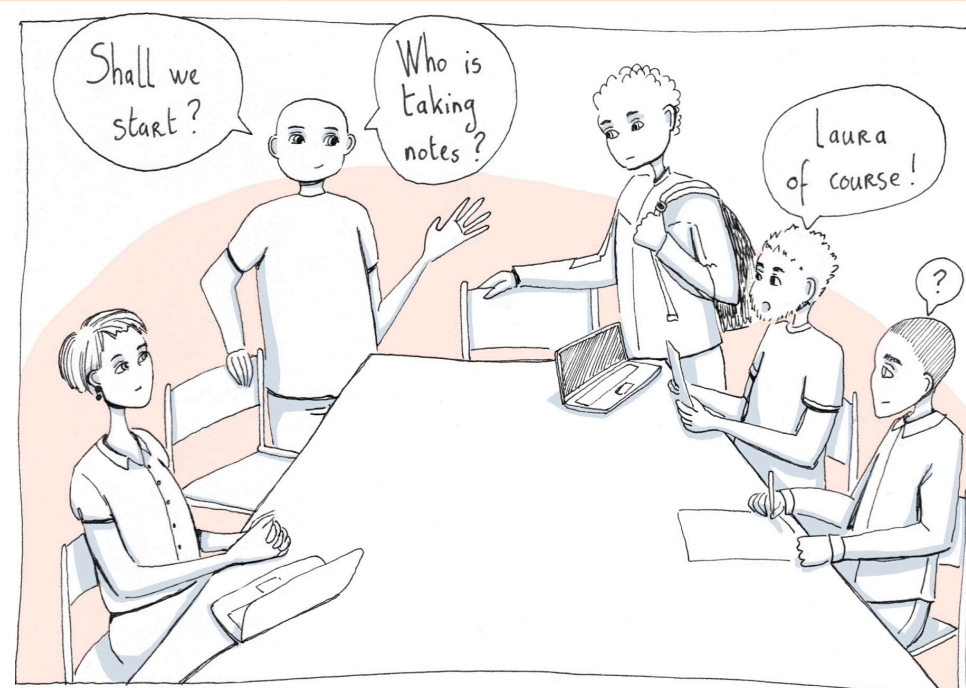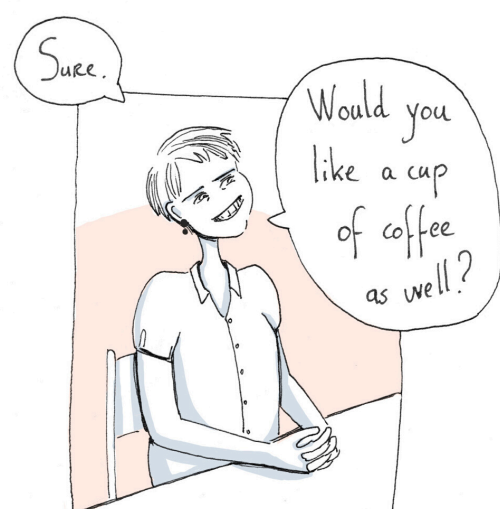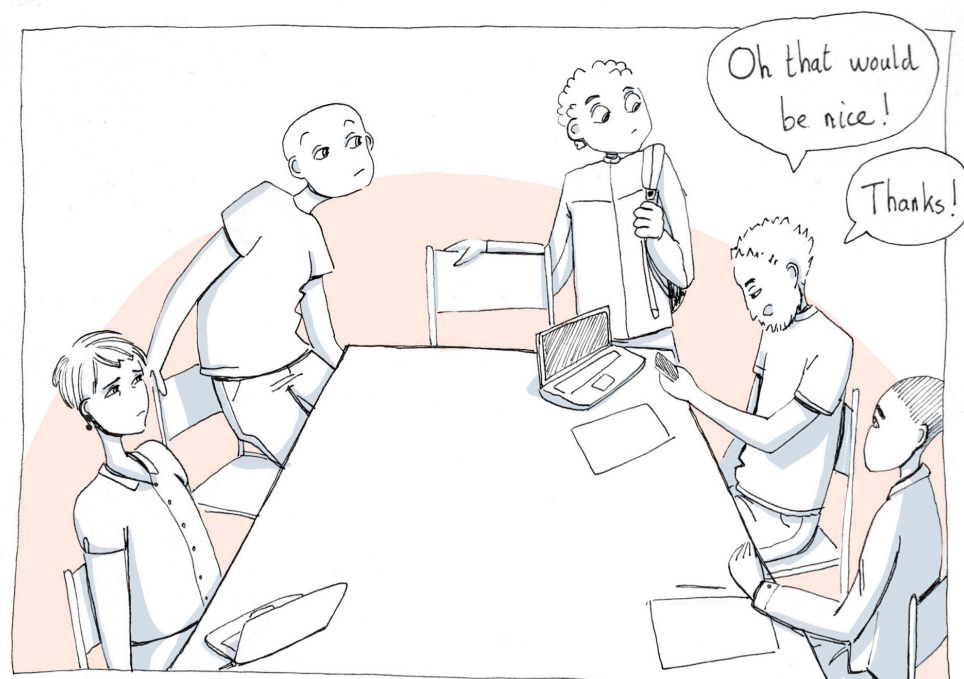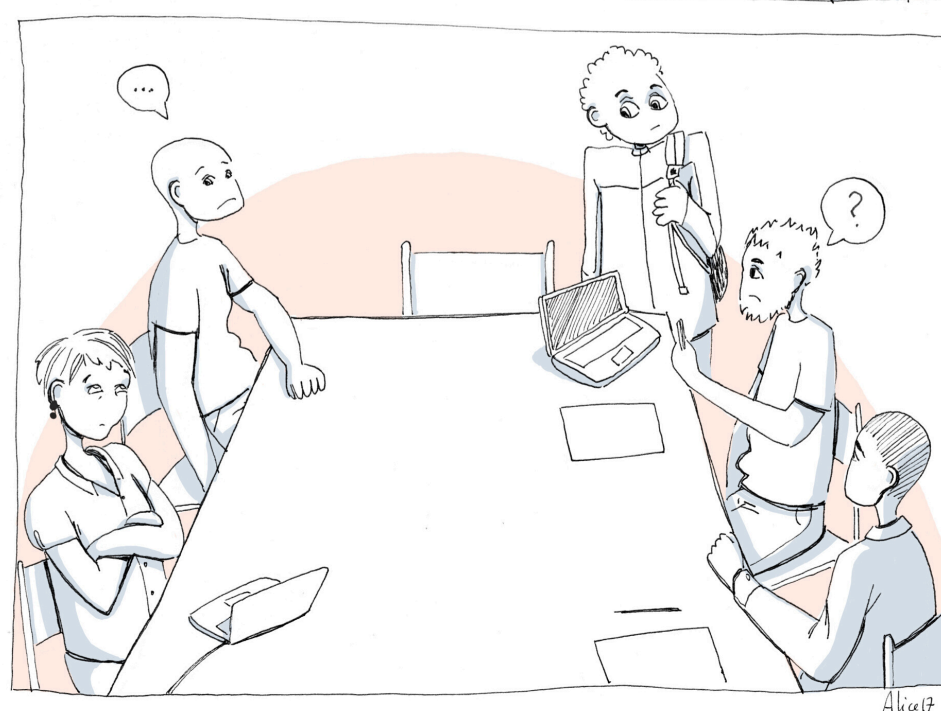

# DIDTHISREALLYHAPPEN.NET

promoting gender equality in academia

Through comics we share stories of events that actually happened, but that, we think, do not have their place in a professional environment (or in any environment, for that matter). We want to show daily sexist comments and behaviors, not to point fingers at specific people, not to show what is the right way to act, but to encourage discussions between coworkers, and, hopefully, to make people think about how, as a group, we can do better.

**SHARE YOUR STORY WITH US THROUGH OUR WEBPAGE OR VIA  
MAIL.DIDTHISREALLYHAPPEN@GMAIL.COM**



# PROFESSOR LIKES BLONDES

## INTERNATIONAL CONFERENCE

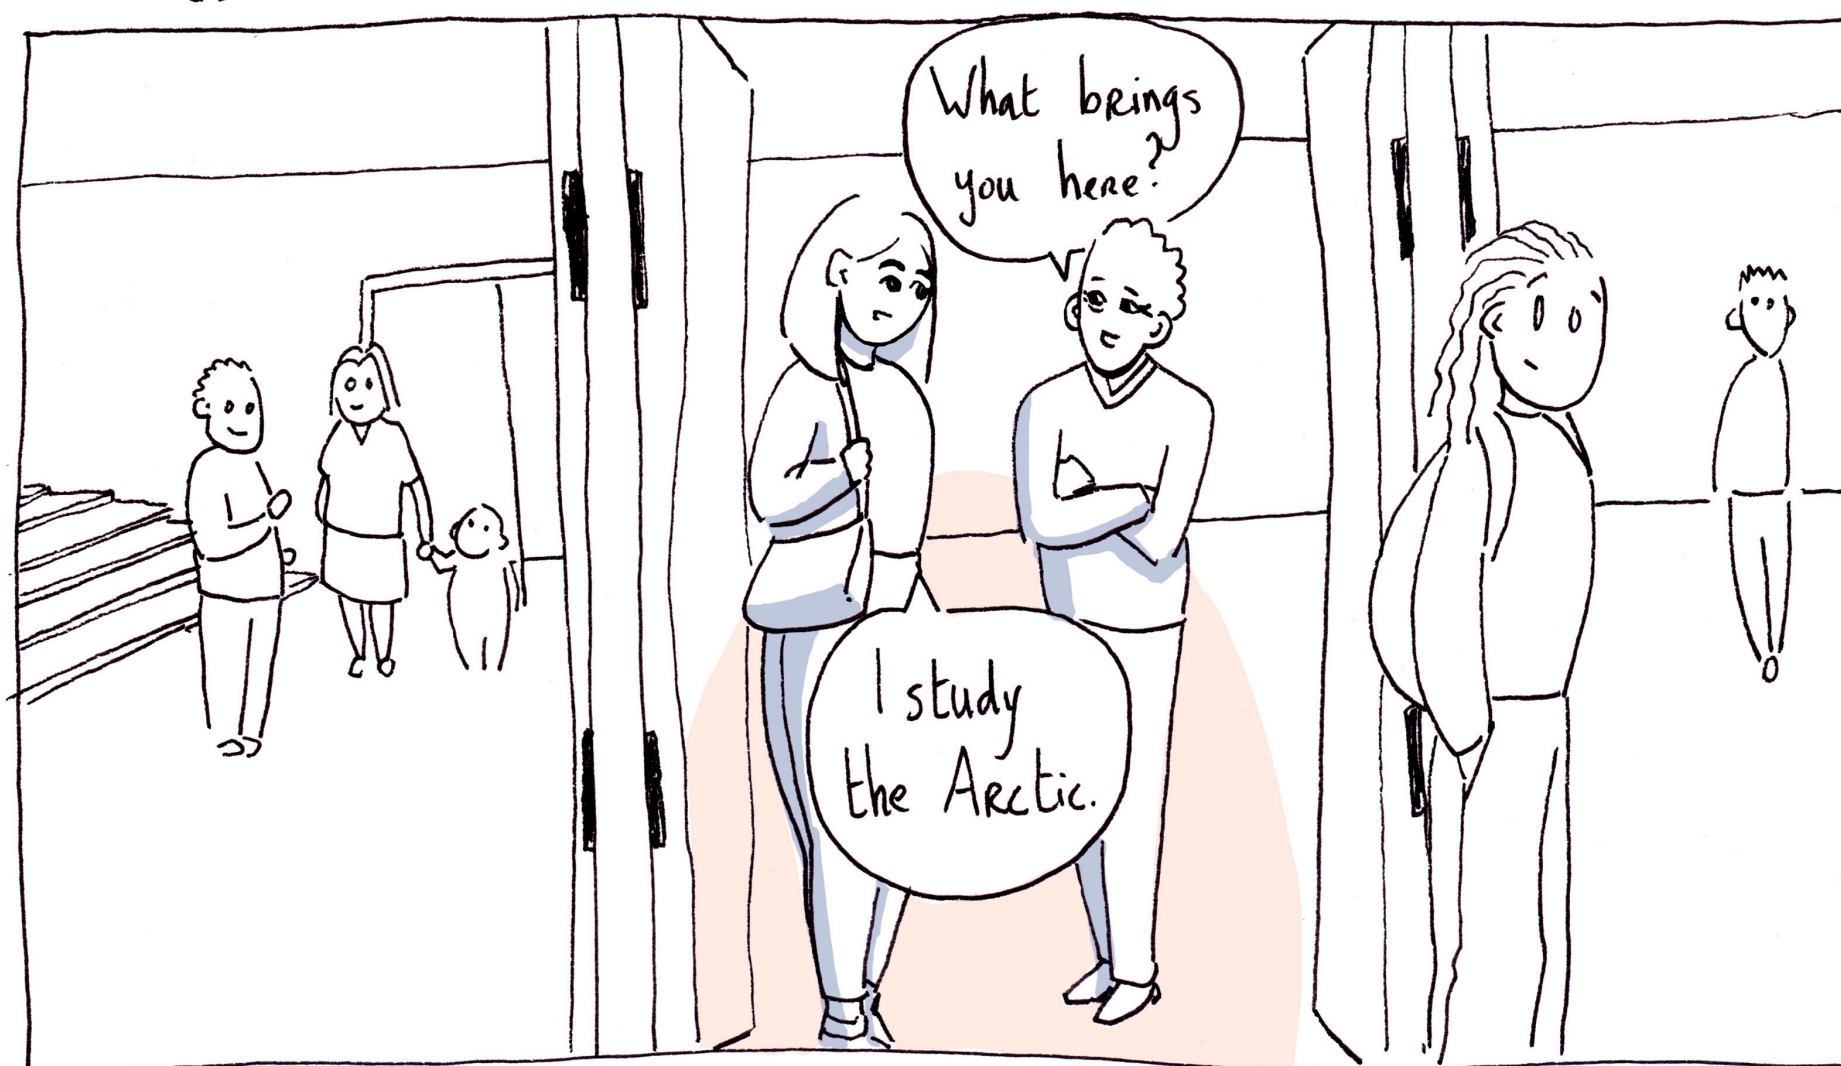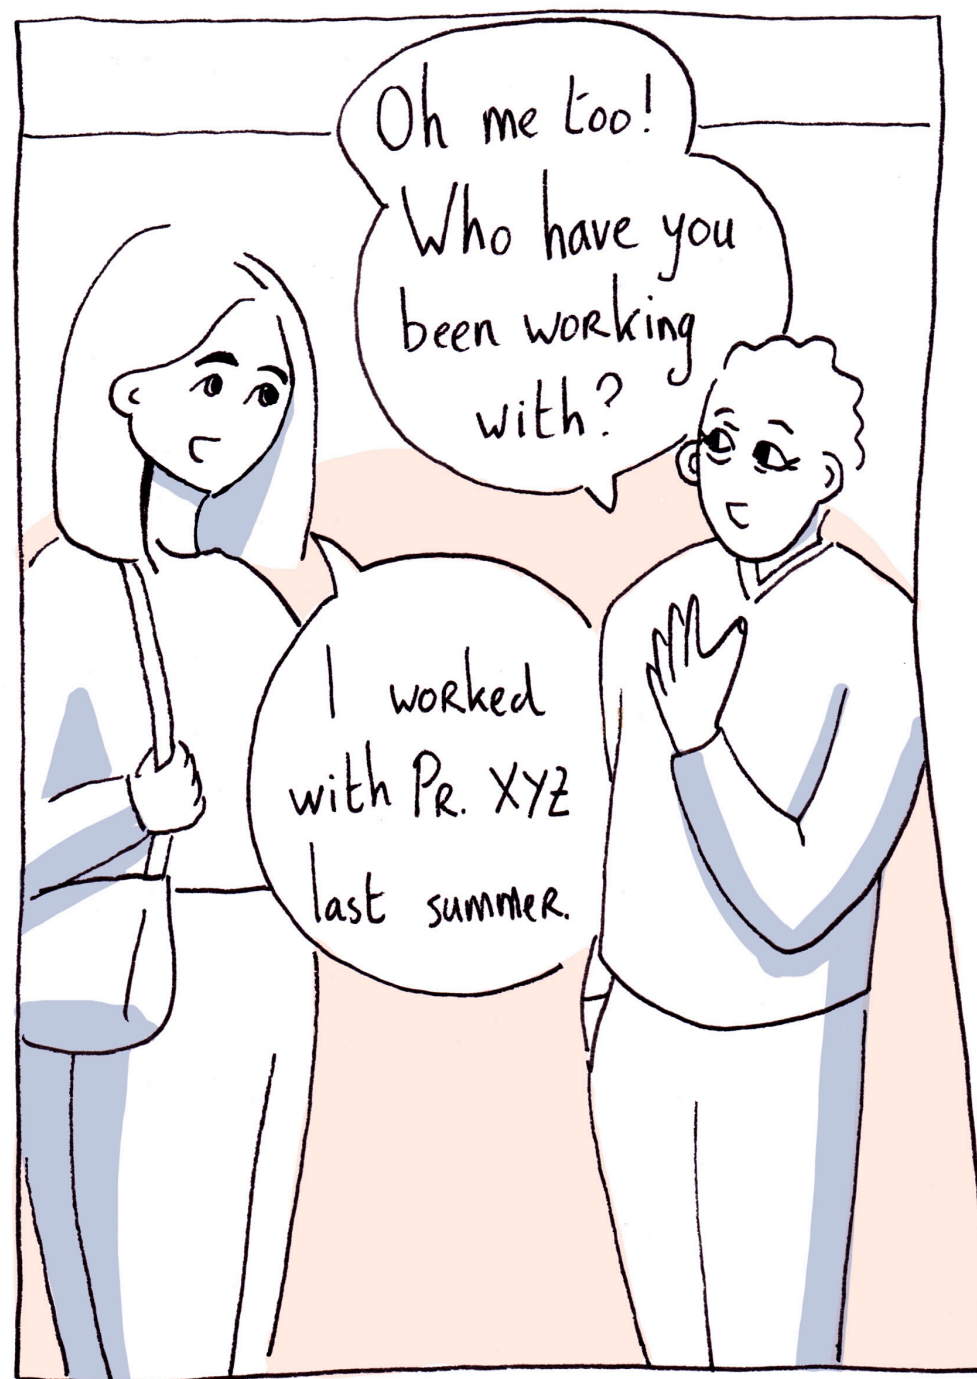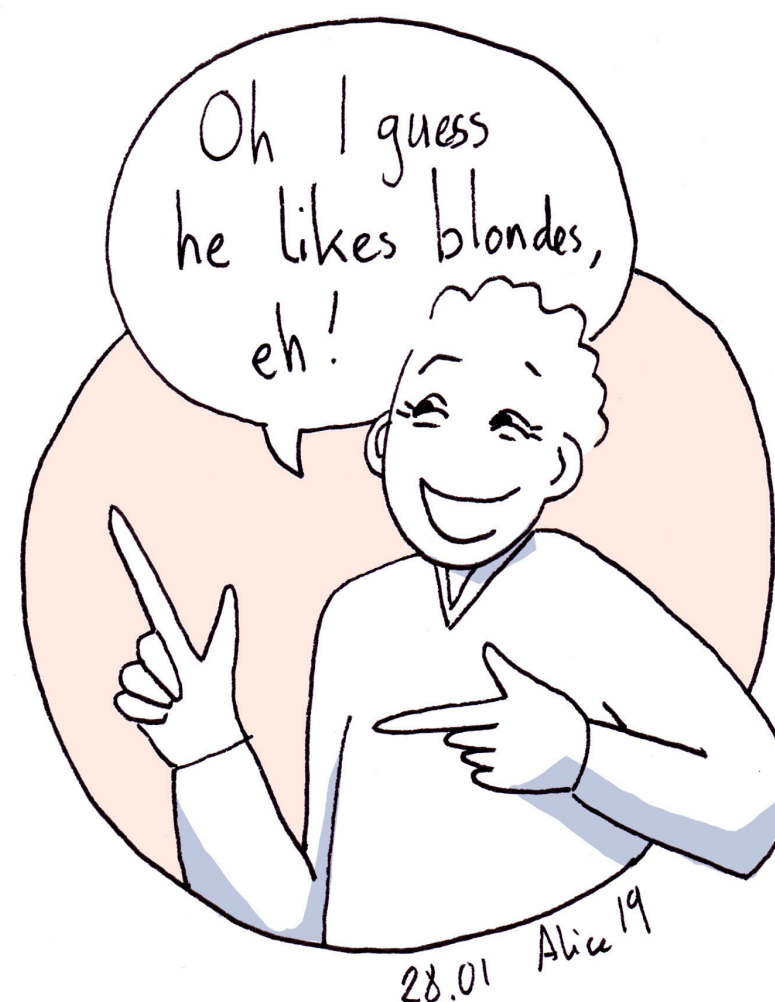

# DIDTHISREALLYHAPPEN.NET

promoting gender equality in academia

Through comics we share stories of events that actually happened, but that, we think, do not have their place in a professional environment (or in any environment, for that matter). We want to show daily sexist comments and behaviors, not to point fingers at specific people, not to show what is the right way to act, but to encourage discussions between coworkers, and, hopefully, to make people think about how, as a group, we can do better.

**SHARE YOUR STORY WITH US THROUGH OUR WEBPAGE OR VIA  
MAIL.DIDTHISREALLYHAPPEN@GMAIL.COM**



## CONFERENCE WAKE UP

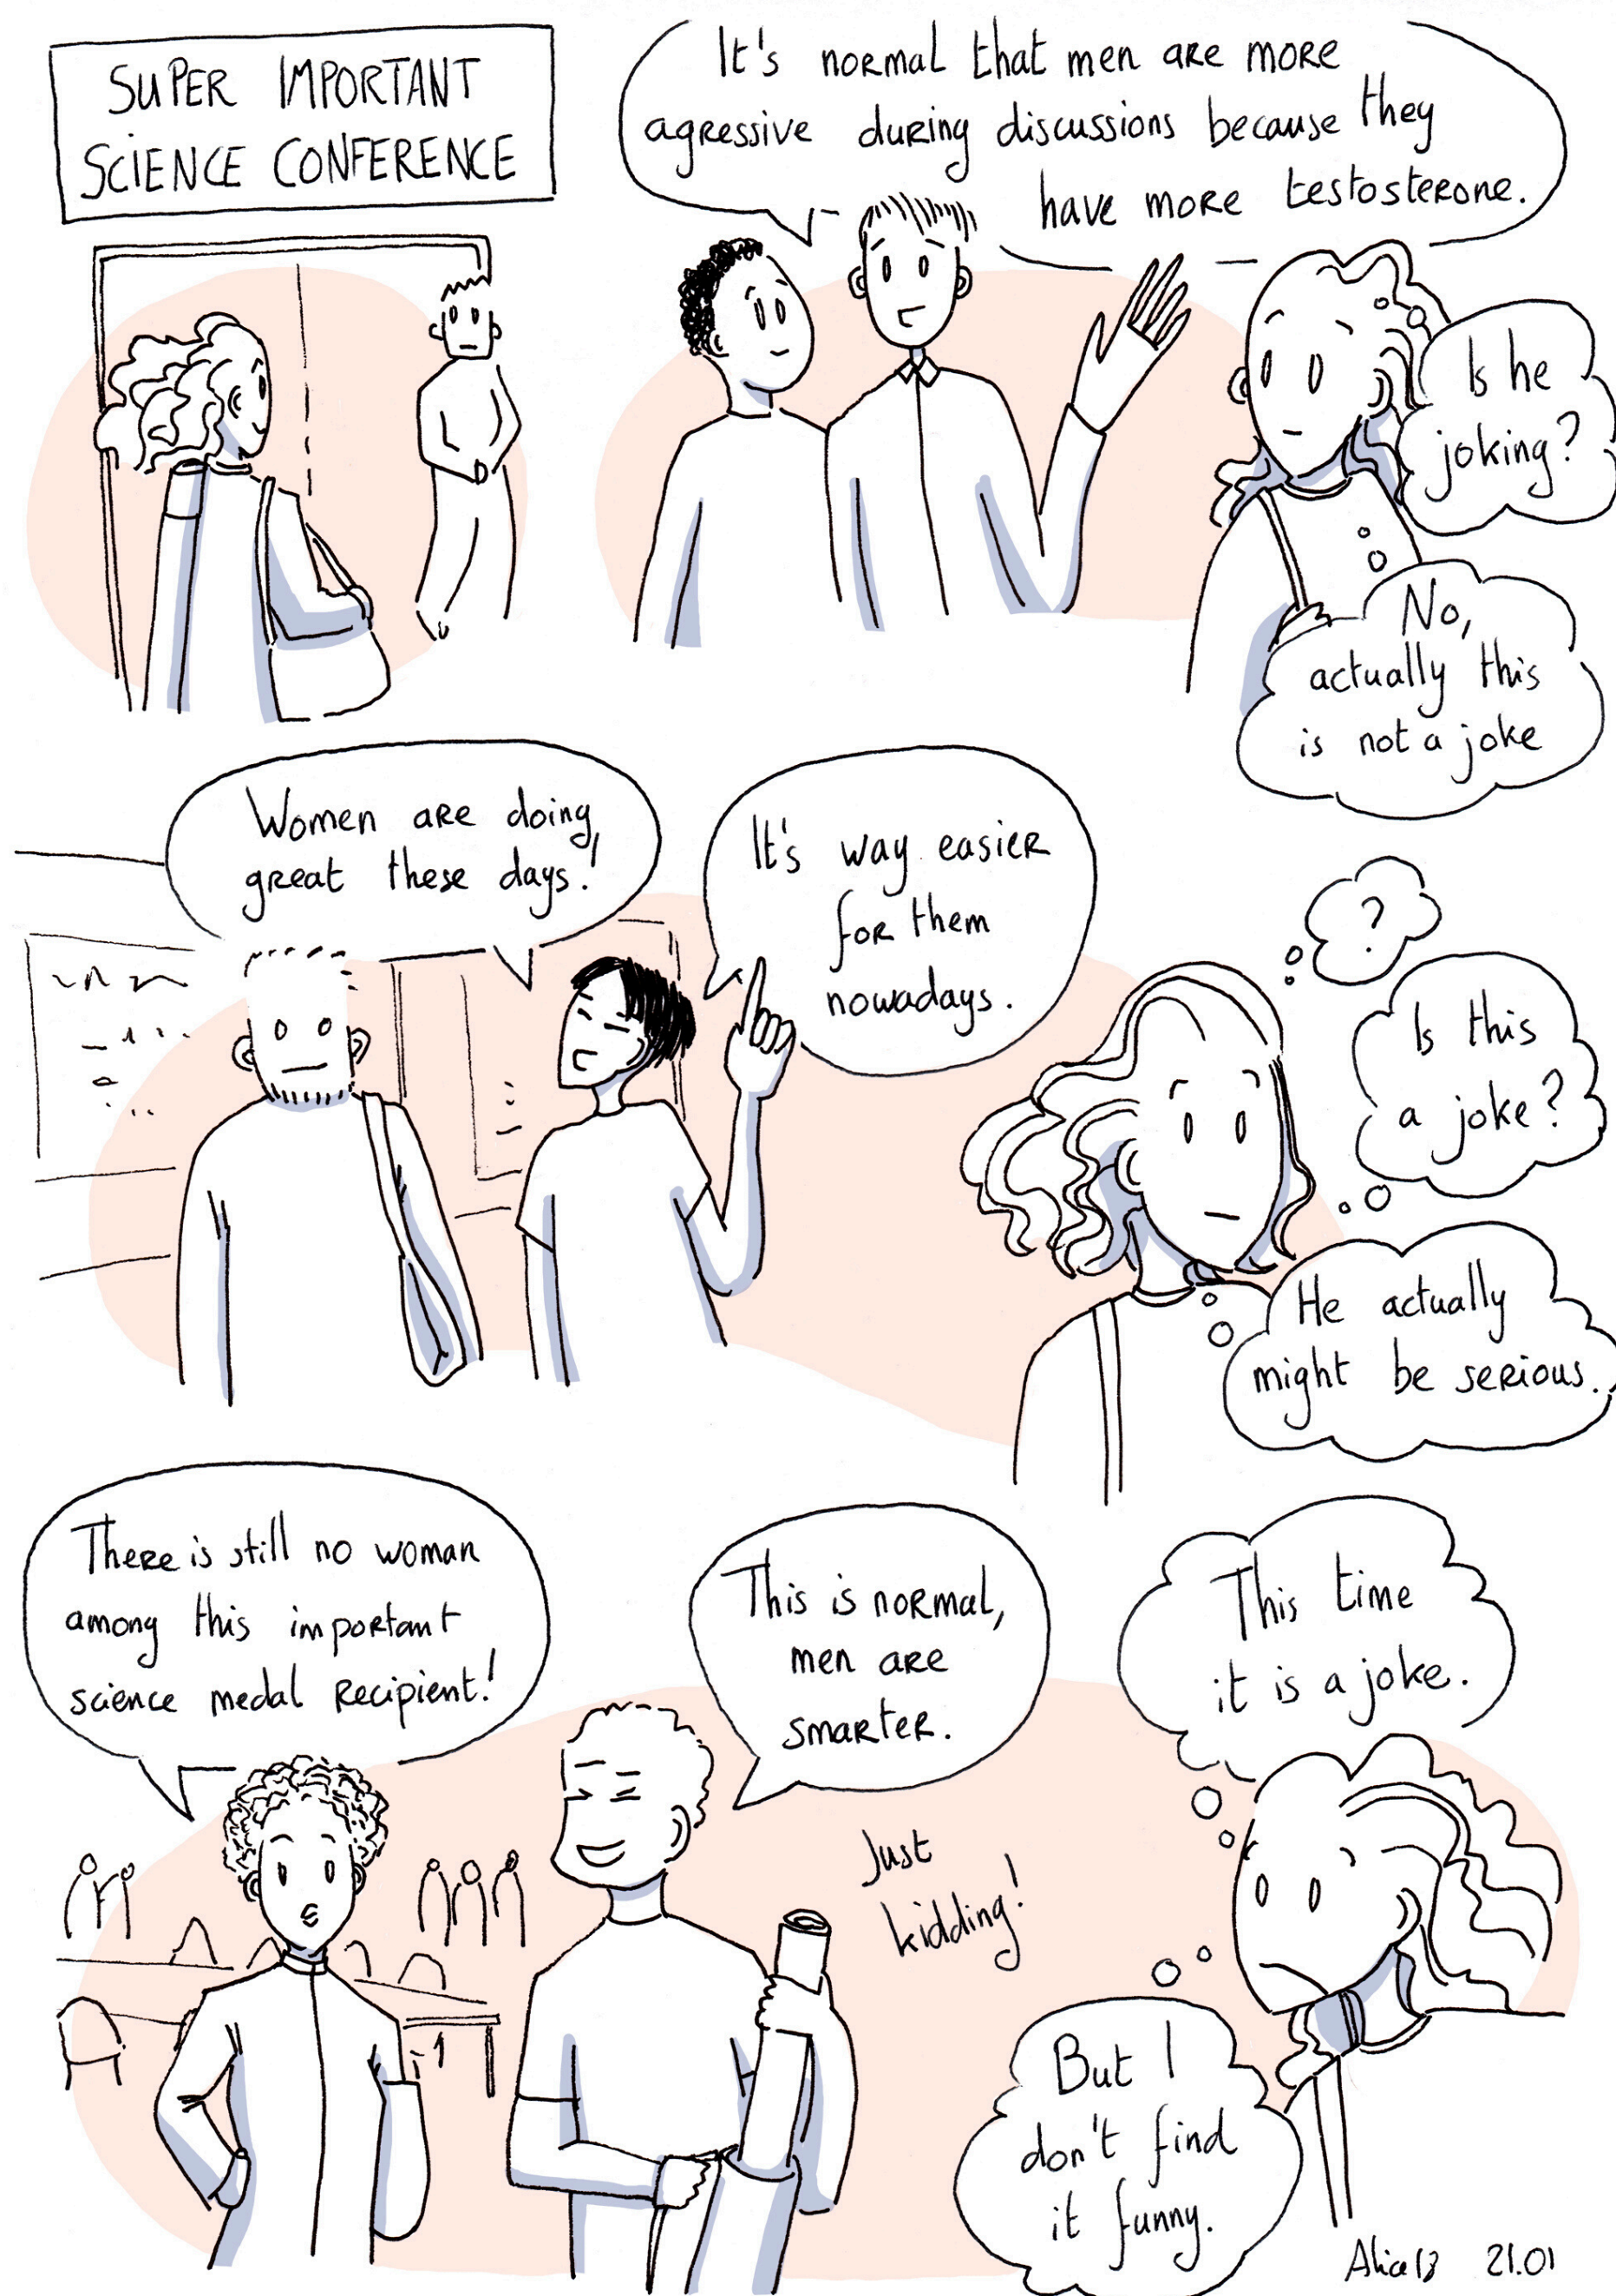

**DIDTHISREALLYHAPPEN.NET**  
promoting gender equality in academia

Through comics we share stories of events that actually happened, but that, we think, do not have their place in a professional environment (or in any environment, for that matter). We want to show daily sexist comments and behaviors, not to point fingers at specific people, not to show what is the right way to act, but to encourage discussions between coworkers, and, hopefully, to make people think about how, as a group, we can do better.

**SHARE YOUR STORY WITH US THROUGH OUR WEBPAGE OR VIA  
MAIL.DIDTHISREALLYHAPPEN@GMAIL.COM**



## HIS WIFE GOT PROMOTED

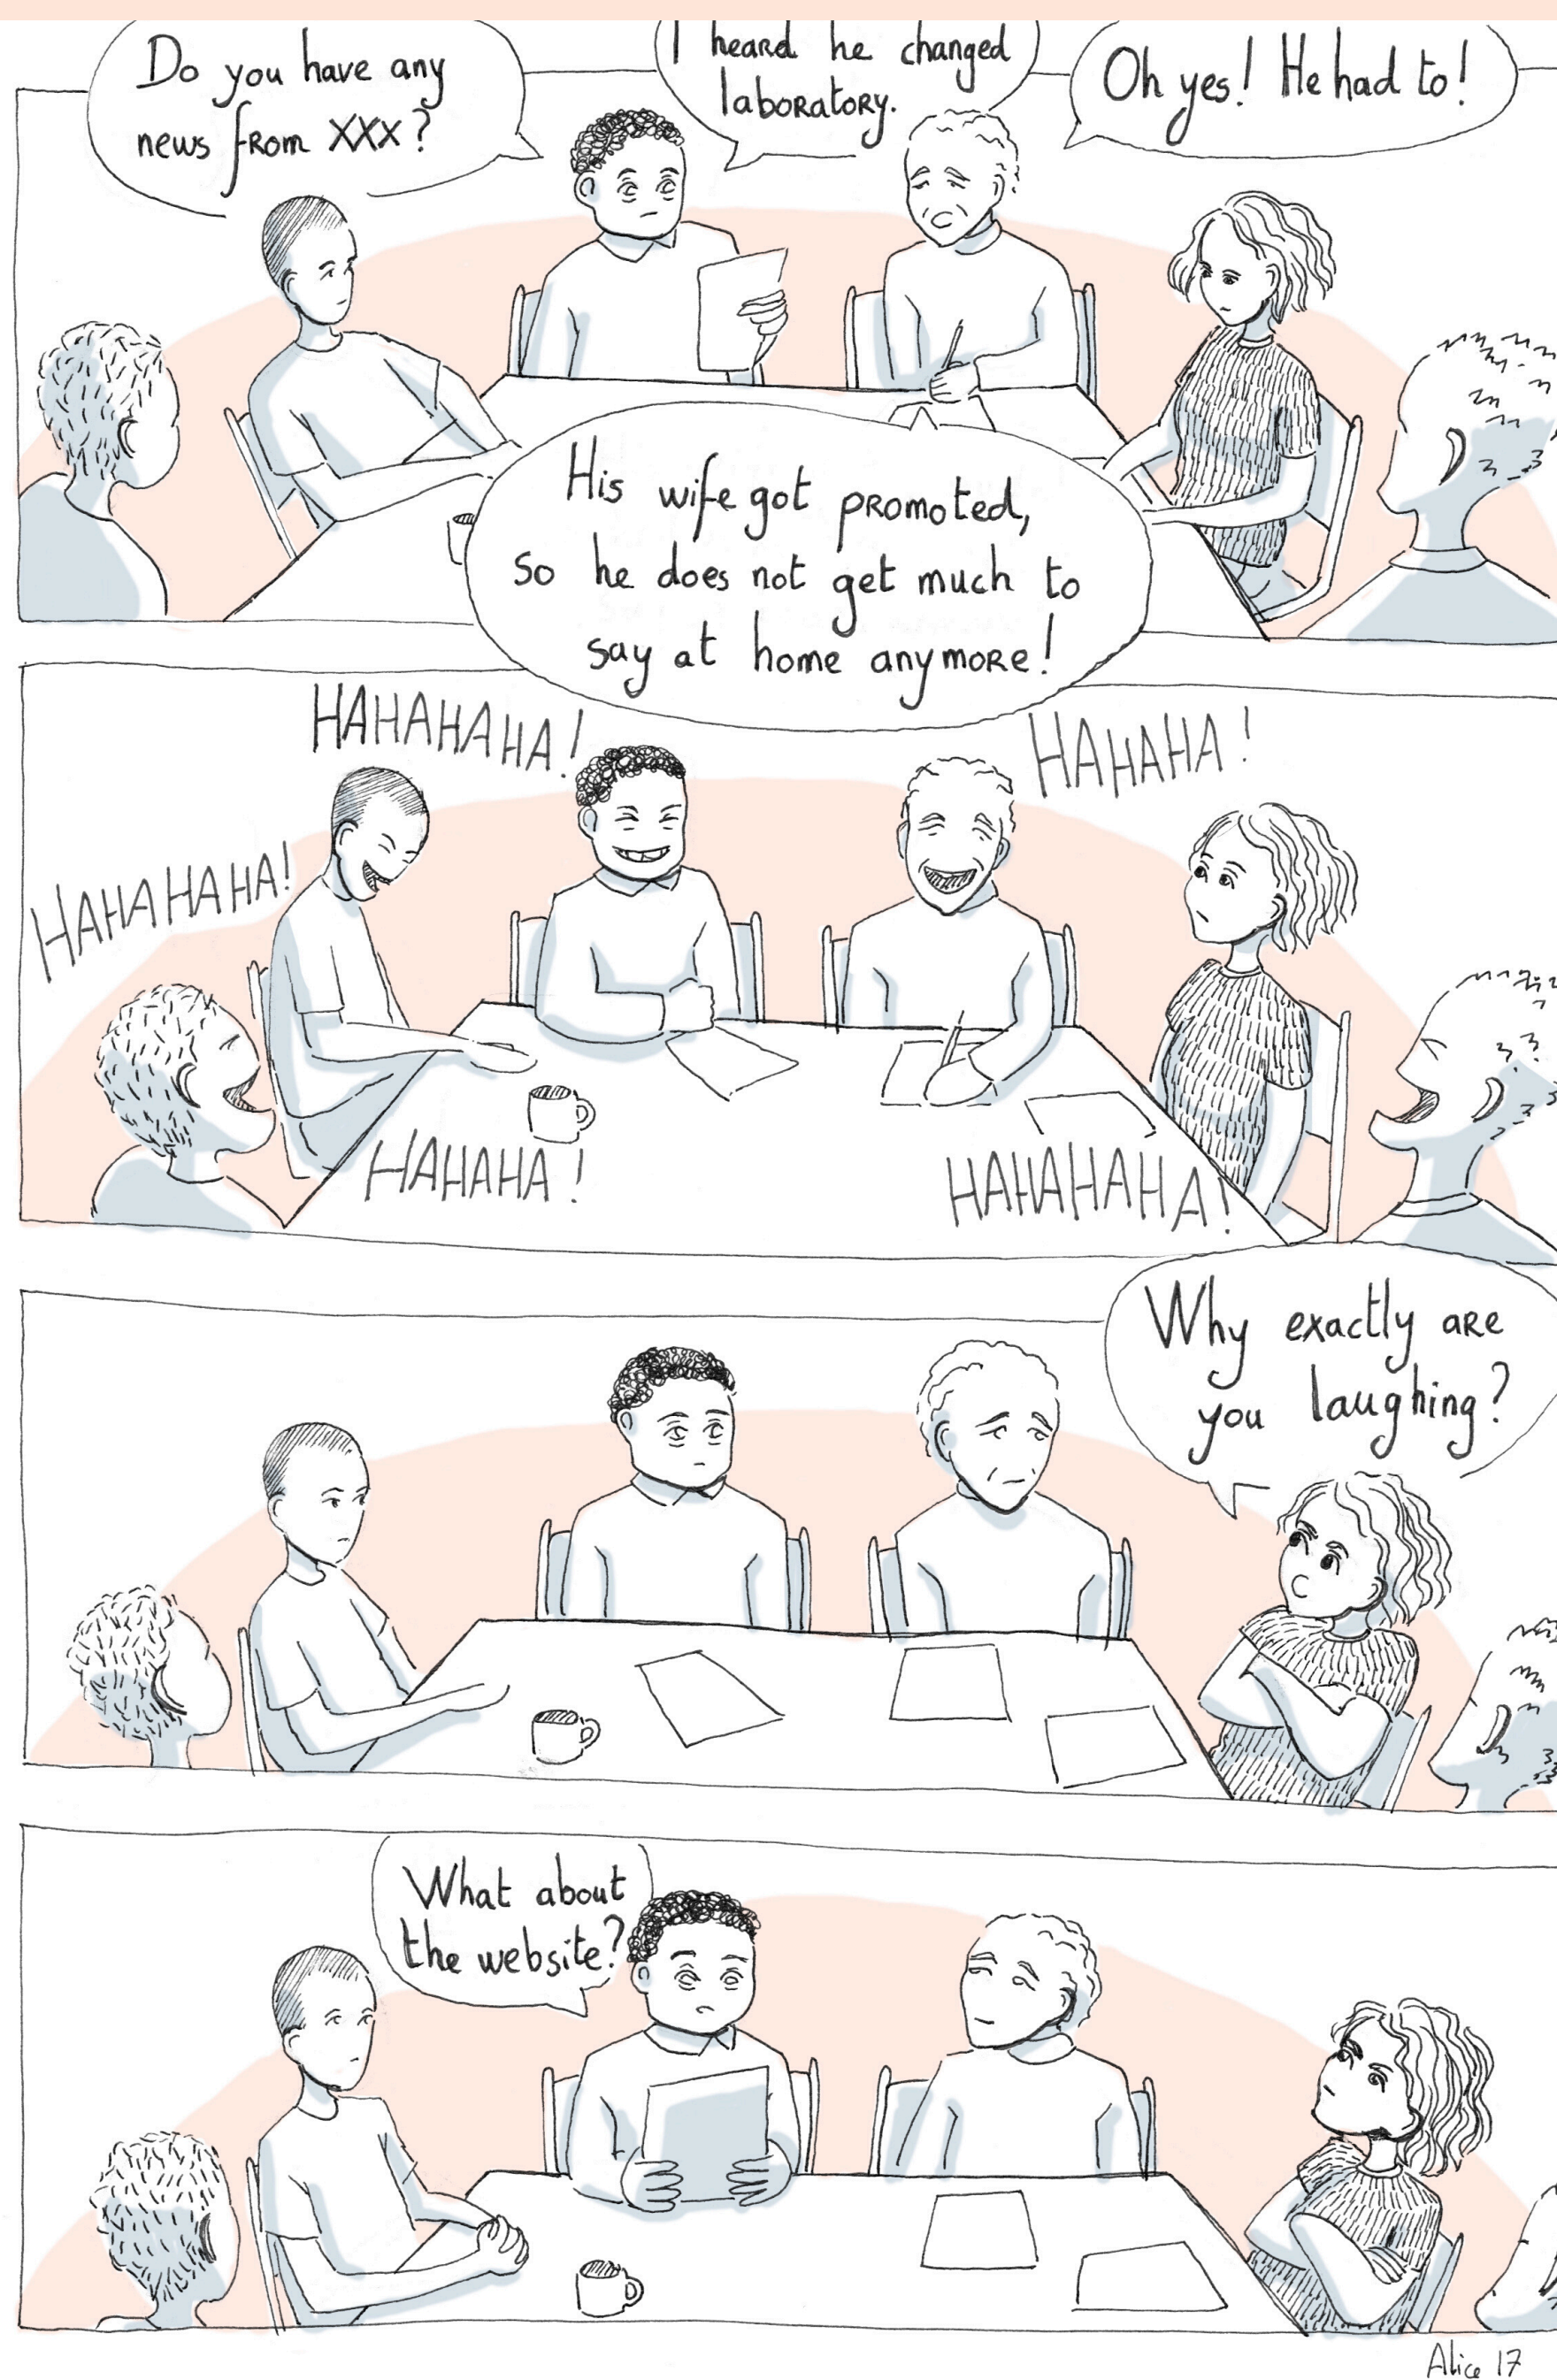

**DIDTHISREALLYHAPPEN.NET**  
promoting gender equality in academia

Through comics we share stories of events that actually happened, but that, we think, do not have their place in a professional environment (or in any environment, for that matter). We want to show daily sexist comments and behaviors, not to point fingers at specific people, not to show what is the right way to act, but to encourage discussions between coworkers, and, hopefully, to make people think about how, as a group, we can do better.

**SHARE YOUR STORY WITH US THROUGH OUR WEBPAGE OR VIA  
MAIL.DIDTHISREALLYHAPPEN@GMAIL.COM**



## A MEN'S WORLD

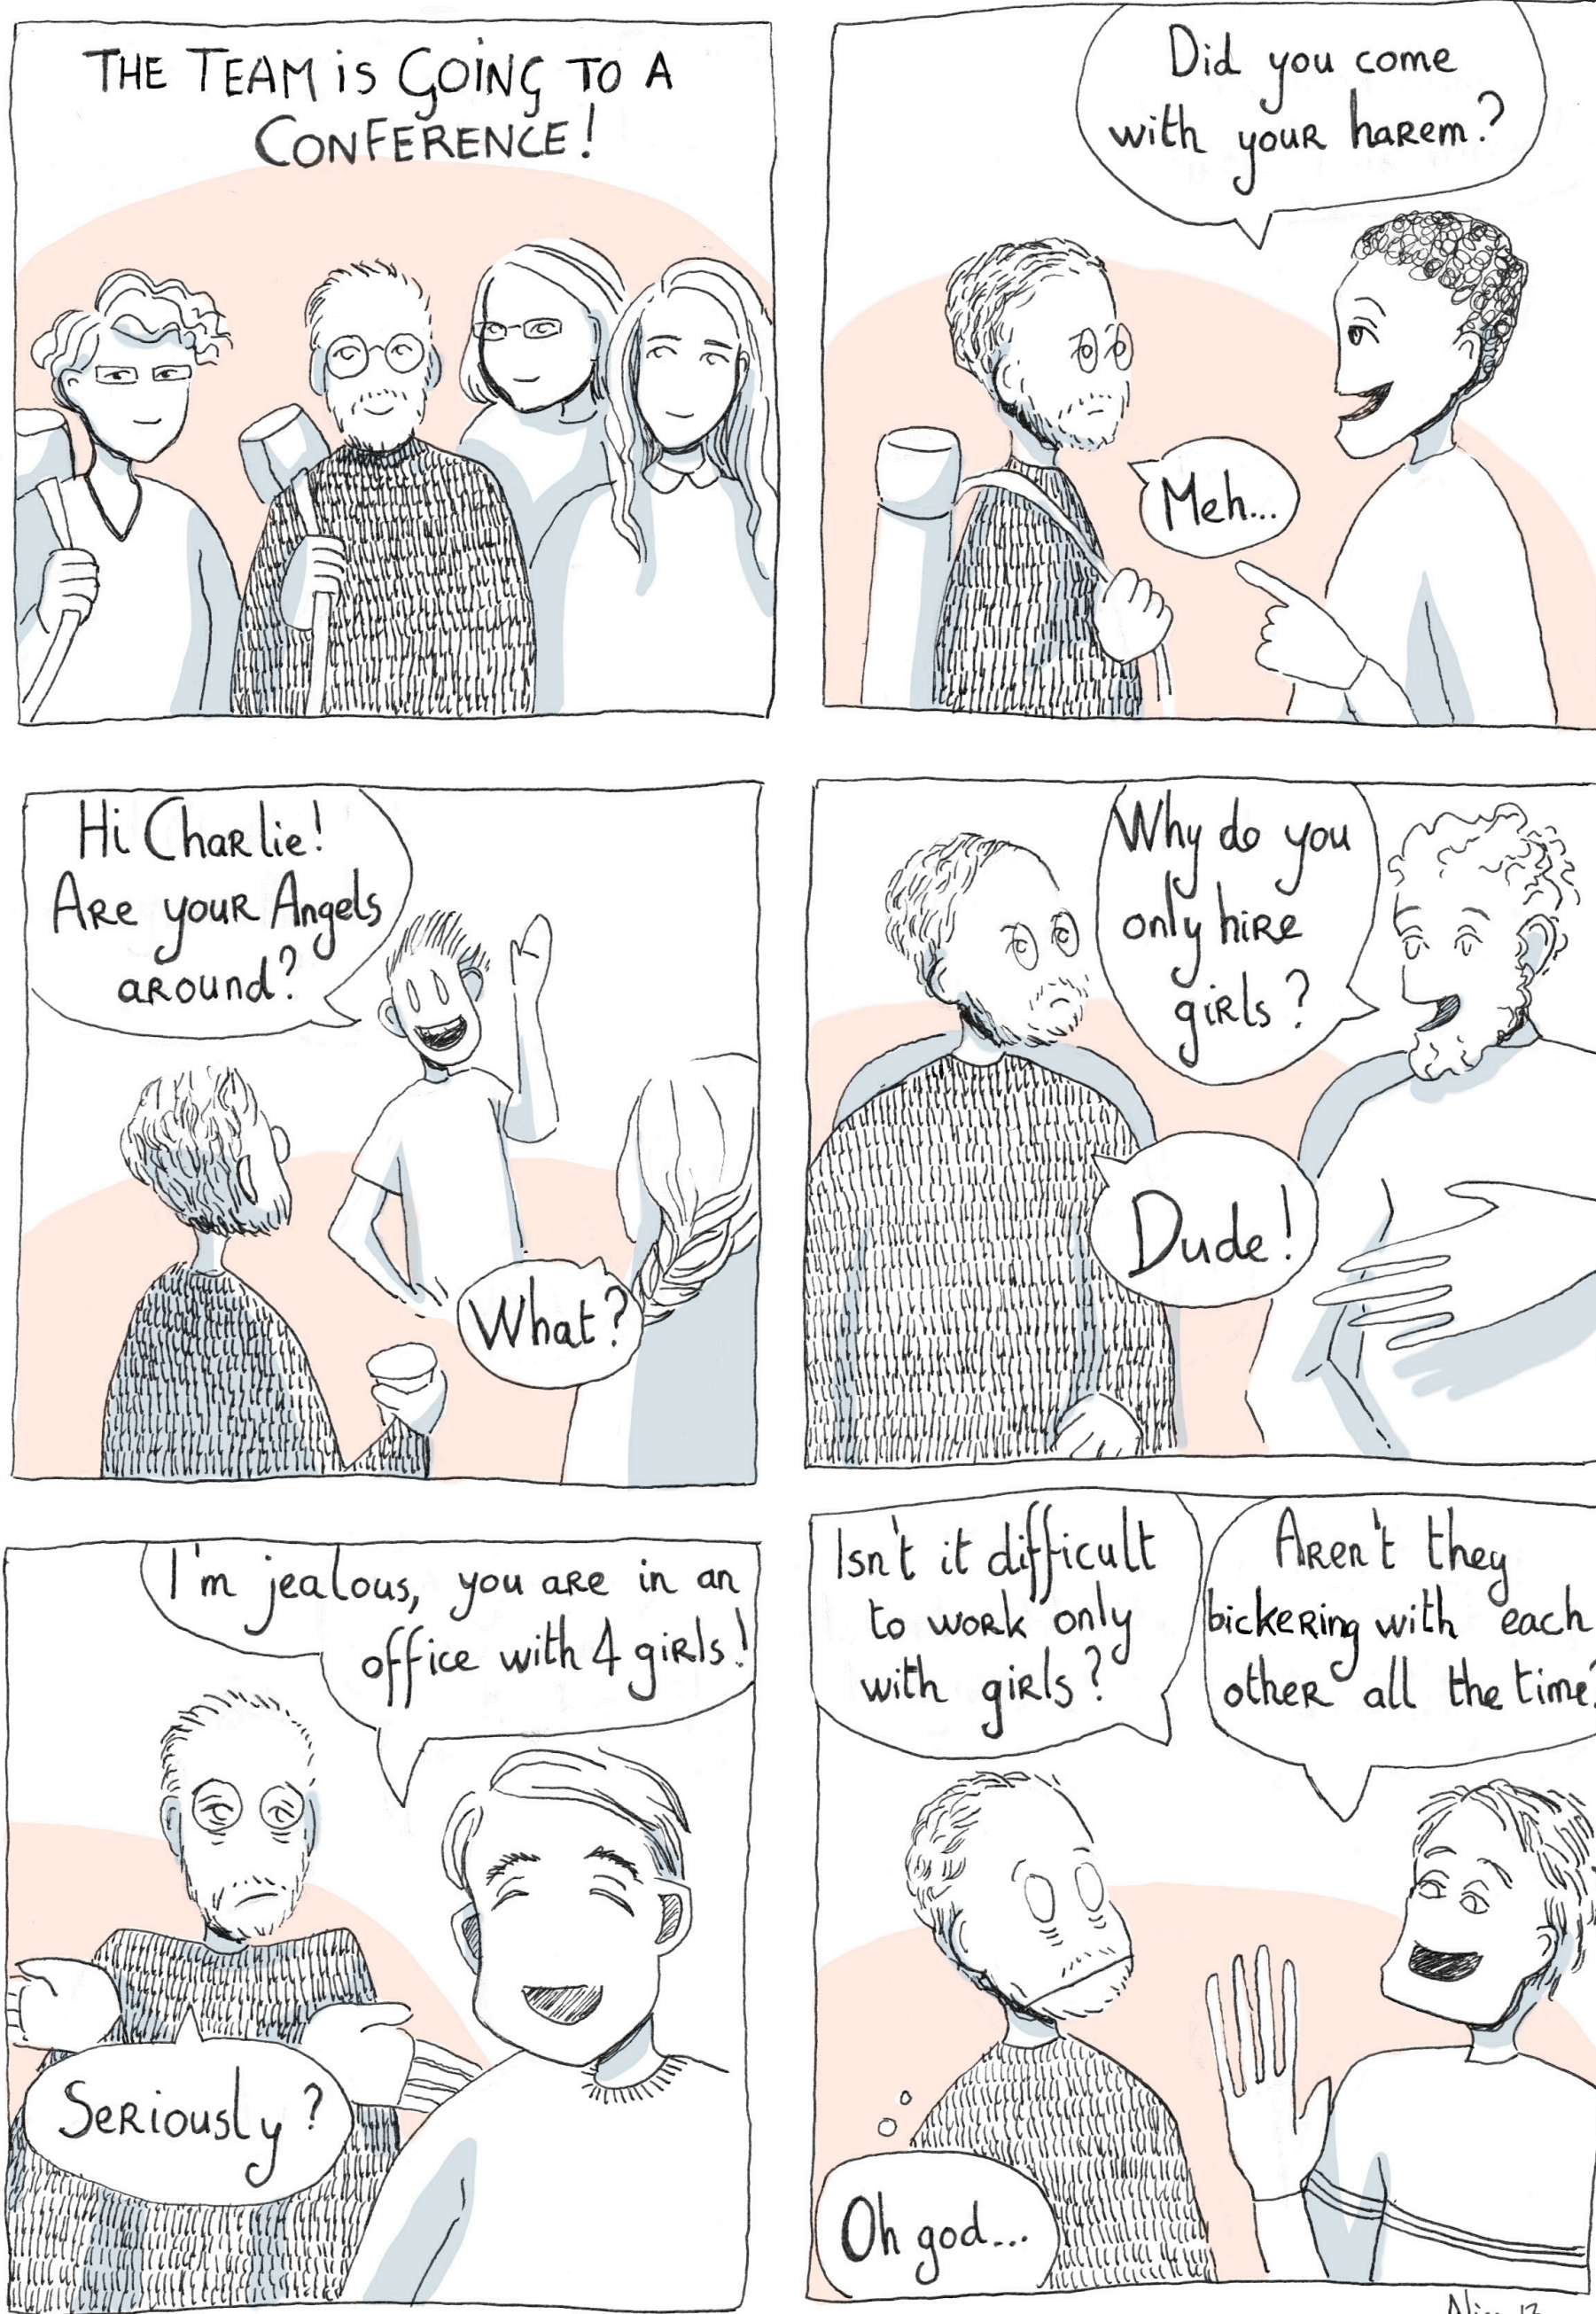

# DIDTHISREALLYHAPPEN.NET

promoting gender equality in academia

Through comics we share stories of events that actually happened, but that, we think, do not have their place in a professional environment (or in any environment, for that matter). We want to show daily sexist comments and behaviors, not to point fingers at specific people, not to show what is the right way to act, but to encourage discussions between coworkers, and, hopefully, to make people think about how, as a group, we can do better.

**SHARE YOUR STORY WITH US THROUGH OUR WEBPAGE OR VIA  
MAIL.DIDTHISREALLYHAPPEN@GMAIL.COM**



## WHO'S YOUR ADVISOR?

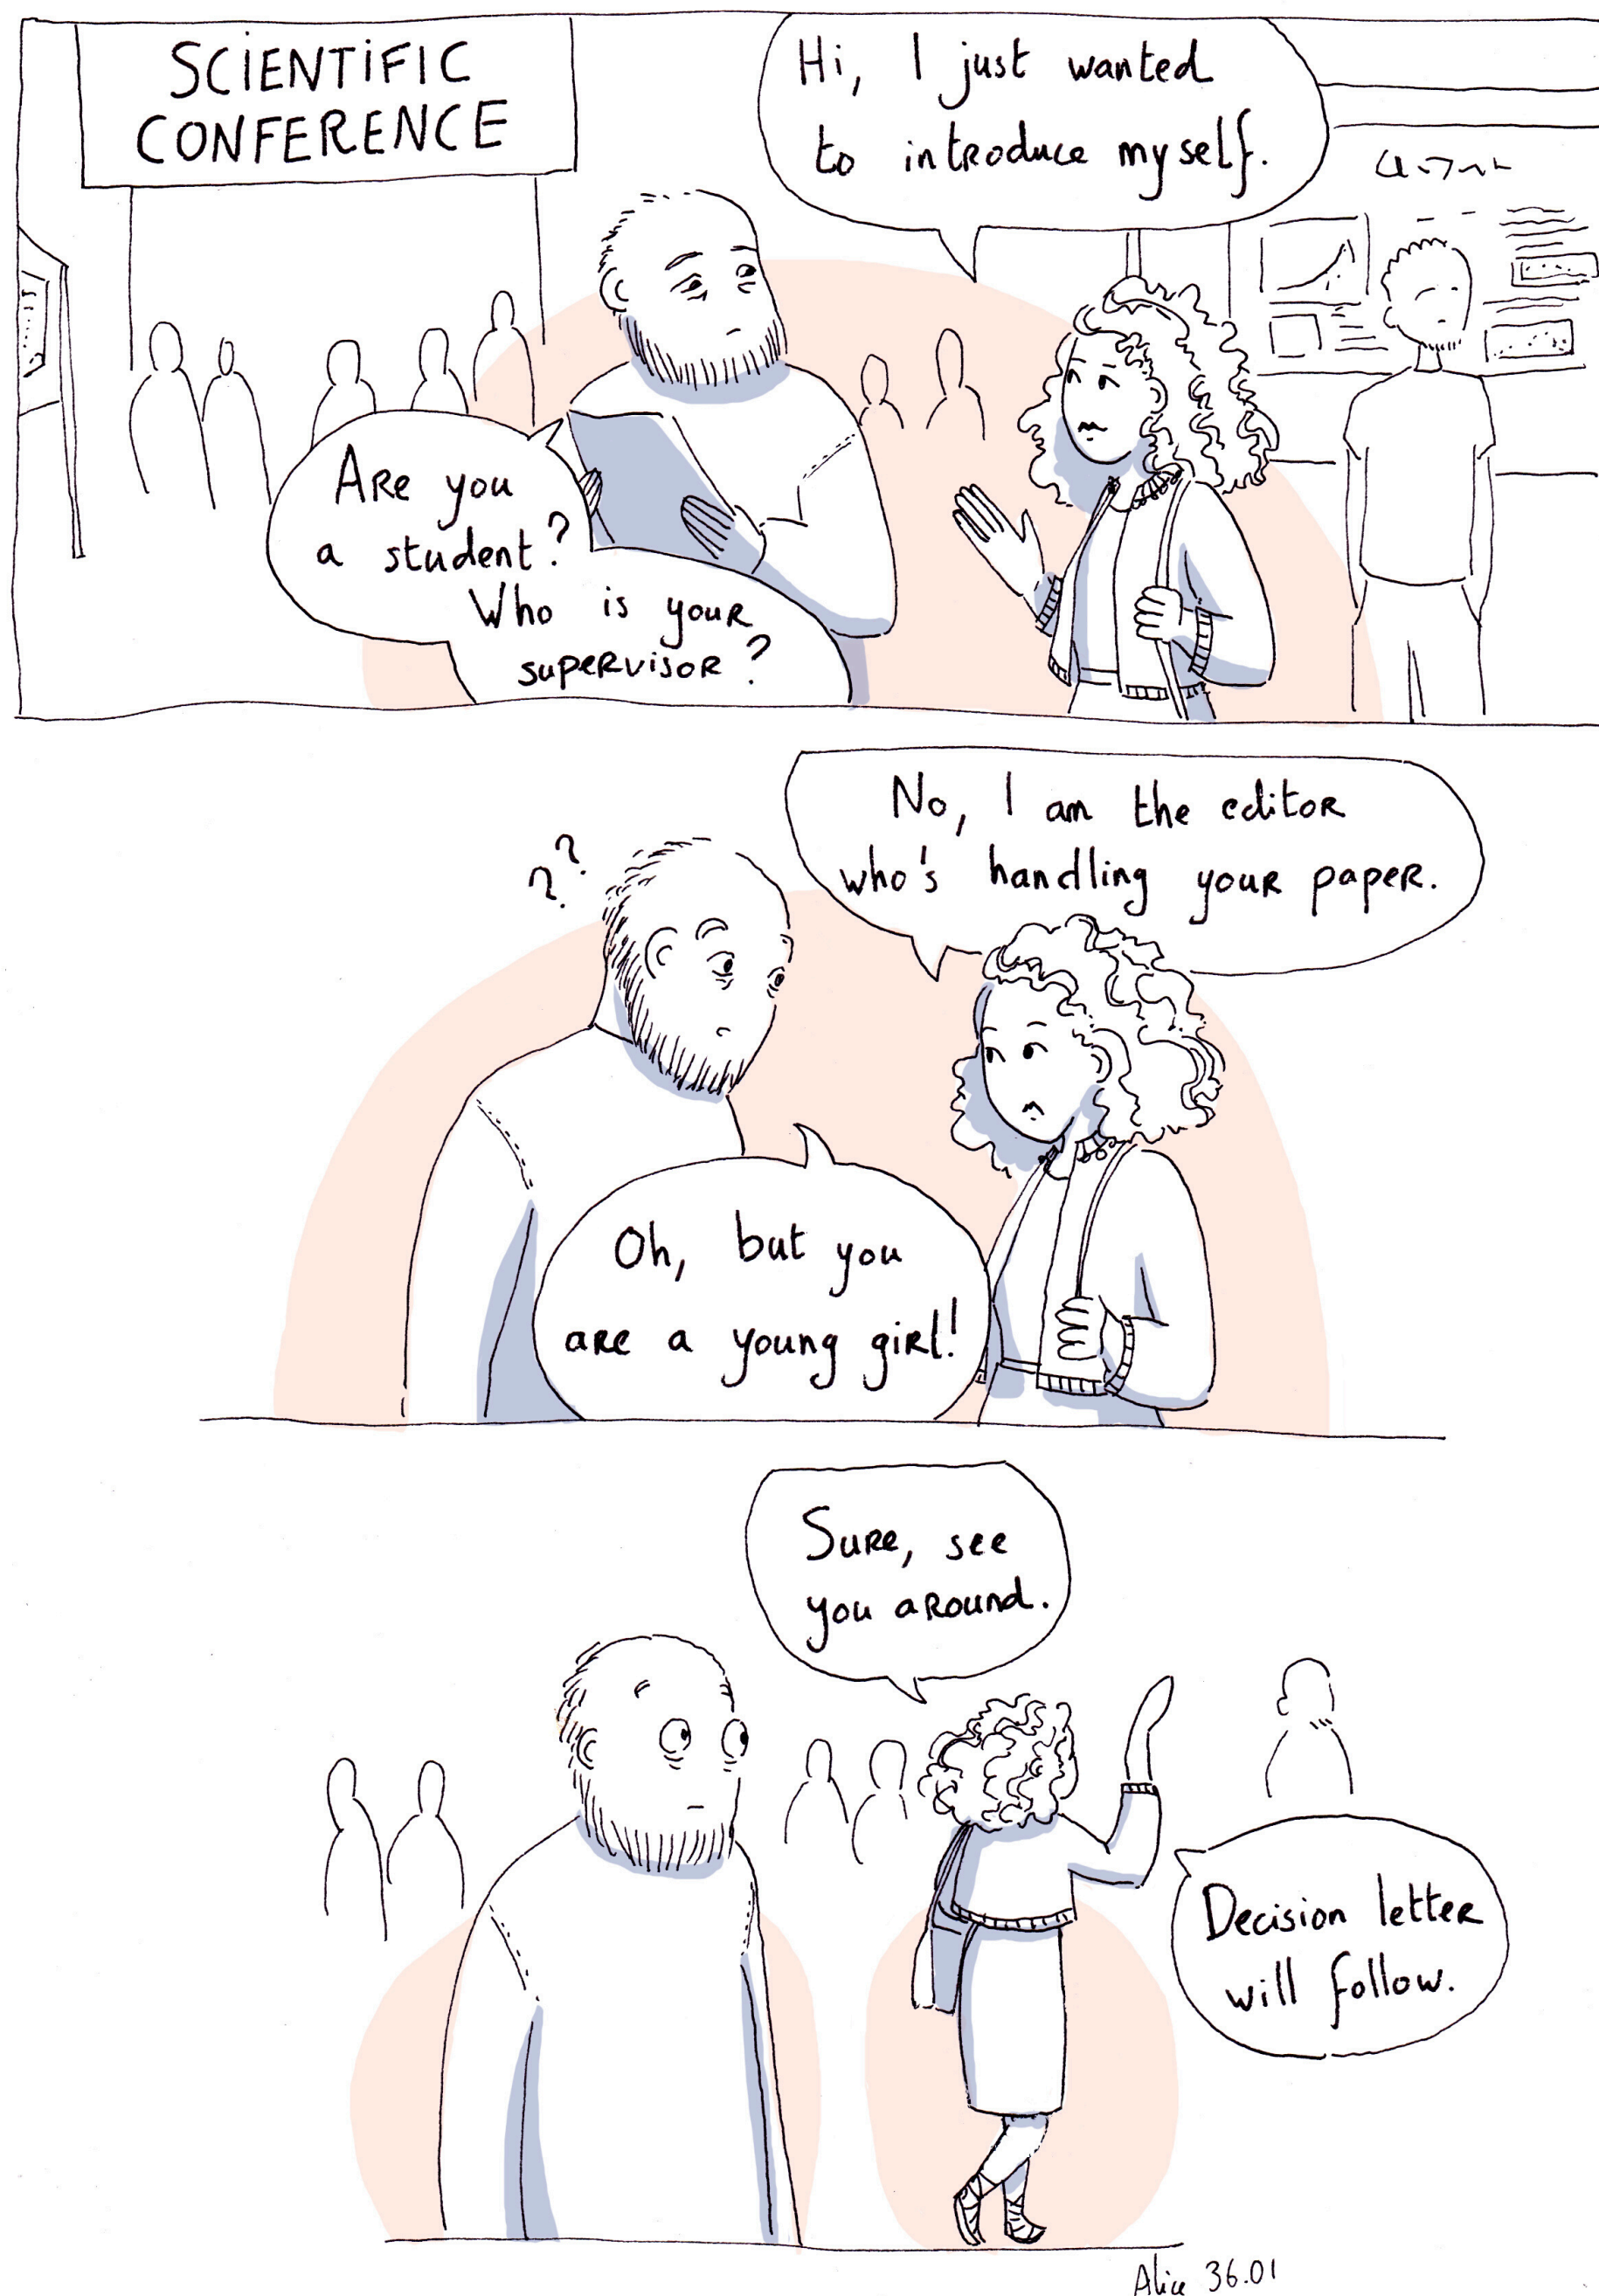

**DIDTHISREALLYHAPPEN.NET**  
promoting gender equality in academia

Through comics we share stories of events that actually happened, but that, we think, do not have their place in a professional environment (or in any environment, for that matter). We want to show daily sexist comments and behaviors, not to point fingers at specific people, not to show what is the right way to act, but to encourage discussions between coworkers, and, hopefully, to make people think about how, as a group, we can do better.

**SHARE YOUR STORY WITH US THROUGH OUR WEBPAGE OR VIA  
MAIL.DIDTHISREALLYHAPPEN@GMAIL.COM**



## LITTLE LADY

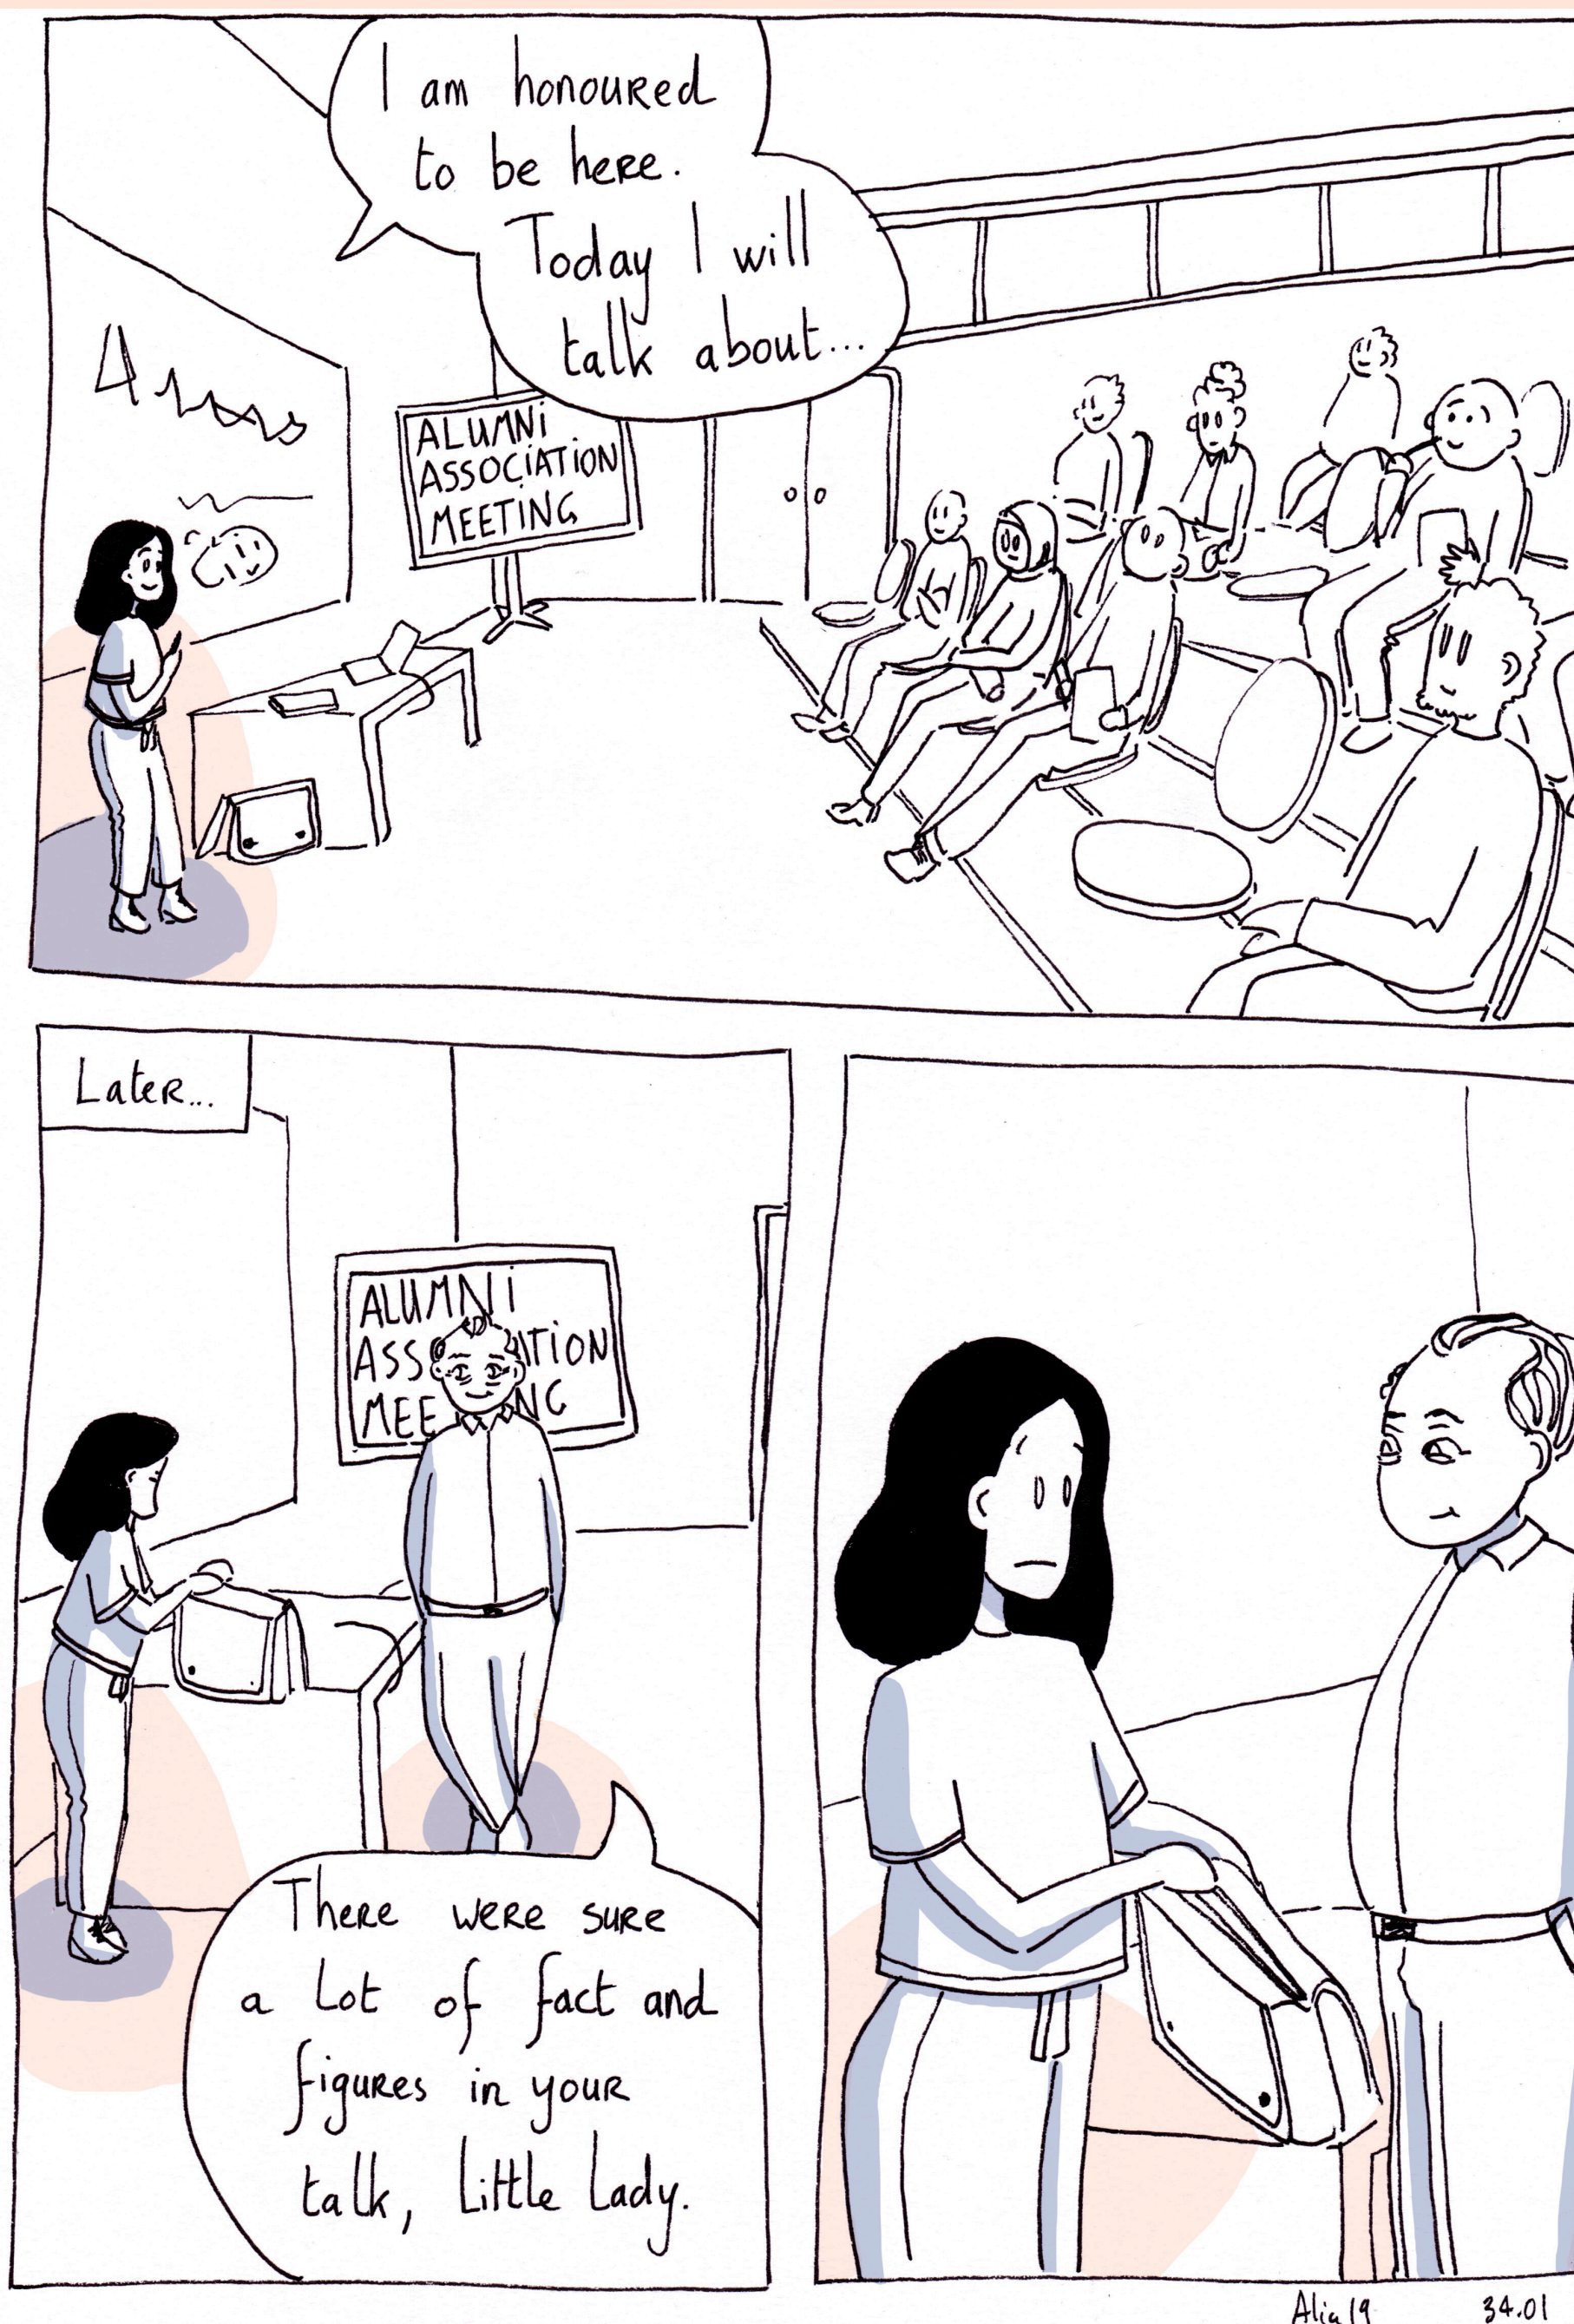

**DIDTHISREALLYHAPPEN.NET**  
promoting gender equality in academia

Through comics we share stories of events that actually happened, but that, we think, do not have their place in a professional environment (or in any environment, for that matter). We want to show daily sexist comments and behaviors, not to point fingers at specific people, not to show what is the right way to act, but to encourage discussions between coworkers, and, hopefully, to make people think about how, as a group, we can do better.

**SHARE YOUR STORY WITH US THROUGH OUR WEBPAGE OR VIA  
MAIL.DIDTHISREALLYHAPPEN@GMAIL.COM**
